# Supplementary material for: The Adaptive Evolution and Gigantism Mechanisms of the Hadal “Supergiant” Amphipod Alicella gigantea
Source: Frontiers journal article supplement (doi:10.3389/fmars.2021.743663), 2021-10-13
Supplement: Table_2.XLSX [file Table_2.XLSX]

## Sheet: Ag_merge_result.txt.fdr0.05.txt
Table S2. The PSGs list of the hadal amphipod A.gigantea.
Ag gene id	Ag gene description	sites	Pvalue	fdr
TRINITY_DN80421_c5_g1_i1	poly(A) polymerase type 3-like	8 K 0.664; 115 V 0.559; 309 Q 0.526; 313 D 0.560; 320 D 0.623; 328 A 0.778; 430 V 0.561	0	0
TRINITY_DN82167_c9_g1_i1	DNA topoisomerase 3-beta-1-like [Penaeus vannamei]	15 E 0.577; 78 Q 0.868; 205 G 0.622; 315 T 0.651; 317 N 0.814; 344 Q 0.688; 359 P 0.755; 368 Y 0.963*	2.5e-08	3.20667e-05
TRINITY_DN84155_c6_g1_i1	PREDICTED: cyclin-H-like [Hyalella azteca]	15 S 0.797; 25 T 0.632; 34 F 0.595; 40 K 0.772; 45 A 0.663; 49 S 0.855; 77 S 0.695; 87 C 0.722; 93 C 0.676; 144 T 0.822; 147 E 0.560; 186 A 0.741; 210 I 0.558; 266 S 0.775; 270 R 0.796; 271 C 0.759; 324 L 0.700; 331 D 0.711	2.3e-08	3.20667e-05
TRINITY_DN80462_c7_g2_i2	PREDICTED: eukaryotic translation initiation factor 5B-like isoform X1 [Hyalella azteca]	31 S 0.717; 58 N 0.765; 64 S 0.769; 69 S 0.814; 72 L 0.969*; 78 P 0.976*; 81 T 0.874; 83 K 0.750; 87 H 0.920; 88 L 0.905; 92 S 0.543; 93 N 0.938; 95 T 0.954*; 114 S 0.956*; 127 T 0.919; 152 E 0.884; 155 P 0.972*; 190 T 0.884; 205 K 0.622; 208 K 0.622; 214 K 0.676; 228 G 0.837; 244 A 0.750; 260 V 0.933; 263 S 0.922; 266 L 0.883; 275 K 0.761; 290 L 0.698; 354 R 0.912; 363 K 0.854; 380 K 0.859; 423 …	6.1e-08	5.8682e-05
TRINITY_DN83140_c0_g1_i3	PREDICTED: uncharacterized protein LOC108681660 [Hyalella azteca]	7 P 0.685; 12 P 0.785; 15 A 0.753; 27 S 0.511; 33 R 0.568; 34 S 0.816; 46 C 0.796; 47 H 0.635; 62 S 0.793; 70 S 0.592; 77 N 0.876; 93 D 0.878; 98 K 0.787; 102 R 0.854; 111 W 0.590; 115 Q 0.845; 116 D 0.825; 124 R 0.581; 126 D 0.822; 133 T 0.566; 136 Q 0.773; 137 Q 0.696; 146 K 0.590; 149 Y 0.840; 153 S 0.718; 160 N 0.596; 164 V 0.628; 196 L 0.877; 198 Q 0.891; 204 G 0.635; 215 A 0.547; 224 T 0.64…	1.71e-07	0.000131602
TRINITY_DN77513_c0_g1_i2	NA	1 L 0.684; 6 N 0.887; 8 E 0.509; 9 L 0.881; 26 S 0.978*; 27 S 0.546; 31 N 0.673; 35 Q 0.804; 38 A 0.567; 42 V 0.571; 43 S 0.805; 45 G 0.894; 47 V 0.637; 56 P 0.917; 67 K 0.932; 81 S 0.896; 85 L 0.939; 94 I 0.624; 96 K 0.918; 97 N 0.784; 113 K 0.963*; 117 E 0.916; 119 N 0.644; 121 N 0.926; 122 N 0.674; 124 P 0.962*; 126 S 0.956*; 127 F 0.647; 128 N 0.934; 129 K 0.608; 131 M 0.777; 135 S 0.949; 137…	2.47e-07	0.000158409
TRINITY_DN87210_c5_g1_i3	PREDICTED: probable histone-lysine N-methyltransferase CG1716 isoform X3 [Vollenhovia emeryi]	3 N 0.741; 6 N 0.858; 14 T 0.648; 20 L 0.917; 29 A 0.898; 67 I 0.775; 71 T 0.584; 74 Q 0.787; 83 L 0.875; 87 C 0.608; 91 T 0.600; 92 V 0.831; 96 V 0.699; 99 V 0.621; 100 T 0.868; 101 A 0.806; 106 L 0.582; 107 E 0.746; 109 Q 0.880; 110 A 0.894; 116 A 0.781; 151 A 0.880; 154 T 0.858; 181 I 0.576; 191 L 0.616; 213 S 0.589; 226 C 0.582; 244 L 0.631; 246 S 0.898; 261 K 0.577; 284 I 0.808; 300 L 0.854;…	6.4e-07	0.000351817
TRINITY_DN88141_c1_g1_i3	transforming acidic coiled-coil-containing protein 3-like	4 D 0.898; 19 P 0.609; 21 K 0.822; 26 L 0.590; 28 F 0.815; 34 A 0.584; 35 A 0.953*; 37 A 0.948; 41 I 0.884; 49 R 0.750; 60 L 0.919; 62 S 0.926; 64 E 0.693; 70 S 0.581; 72 H 0.568; 77 K 0.862; 78 D 0.637; 79 D 0.922; 85 D 0.850; 89 Q 0.600; 91 T 0.636; 97 Q 0.953*; 98 N 0.689; 100 M 0.830; 101 V 0.766; 108 A 0.923; 109 S 0.975*; 113 P 0.931; 114 D 0.812; 117 N 0.842; 151 W 0.668; 157 G 0.738; 160 …	9.12e-07	0.000438672
TRINITY_DN87830_c6_g1_i3	PREDICTED: serine/threonine-protein kinase 26-like isoform X2 [Hyalella azteca]	294 V 0.532	1.484e-06	0.000586435
TRINITY_DN85583_c5_g1_i1	NA	3 Y 0.611; 4 S 0.948; 8 S 0.640; 9 H 0.716; 14 L 0.710; 17 H 0.698; 19 H 0.638; 21 H 0.799; 25 A 0.890; 27 A 0.890; 32 R 0.674; 33 L 0.892; 34 C 0.971*; 39 Q 0.920; 42 E 0.550; 46 E 0.635; 50 T 0.740; 60 C 0.722; 62 K 0.619; 64 L 0.945; 66 D 0.519; 68 P 0.619; 72 K 0.907; 77 T 0.737; 80 S 0.633; 86 K 0.687; 89 C 0.847; 92 S 0.718; 94 C 0.828; 96 C 0.680; 101 V 0.643; 102 Q 0.618; 103 Q 0.535; 105…	1.524e-06	0.000586435
TRINITY_DN81371_c9_g5_i1	NA	3 C 0.976*; 5 A 0.651; 6 L 0.730; 8 I 0.564; 9 K 0.606; 10 C 0.882; 12 L 0.881; 13 A 0.538; 18 I 0.922; 33 W 0.906; 40 D 0.906; 42 P 0.603; 45 A 0.925; 48 S 0.588; 49 S 0.972*; 51 S 0.890; 56 G 0.965*; 58 G 0.560; 59 A 0.912; 63 V 0.699; 65 T 0.724; 70 A 0.591; 71 D 0.808; 72 S 0.886; 74 N 0.549; 75 Y 0.957*; 82 T 0.951*; 84 A 0.575; 87 A 0.629; 89 P 0.728; 92 L 0.927; 93 Q 0.922; 95 H 0.912; 98 …	2.057e-06	0.000719576
TRINITY_DN86613_c0_g1_i6	LETM1 domain-containing protein 1-like	1 N 0.796; 4 E 0.979*; 7 L 0.608; 20 S 0.761; 21 N 0.800; 27 S 0.551; 29 P 0.754; 32 F 0.591; 34 E 0.945; 48 R 0.631; 50 G 0.822; 58 A 0.930; 61 D 0.863; 66 D 0.641; 69 T 0.963*; 71 R 0.647; 75 T 0.643; 78 G 0.502; 79 G 0.920; 82 S 0.746; 83 S 0.750; 86 R 0.849; 91 V 0.602; 94 L 0.540; 95 L 0.892; 108 R 0.888; 118 R 0.942; 122 V 0.587; 132 S 0.988*; 137 L 0.961*; 146 Q 0.978*; 148 W 0.916; 149 V …	5.32e-06	0.00170595
TRINITY_DN86312_c8_g1_i2	28S ribosomal protein S27, mitochondrial-like	NA	6.693e-06	0.00198113
TRINITY_DN84386_c4_g2_i1	PREDICTED: uncharacterized protein LOC108675684 [Hyalella azteca]	1 T 0.741; 2 K 0.671; 3 K 0.697; 4 K 0.697; 5 R 0.678; 6 G 0.671; 7 R 0.757; 8 A 0.772; 9 D 0.655; 10 S 0.695; 11 S 0.800; 12 T 0.859; 13 S 0.856; 14 V 0.681; 15 Q 0.790; 16 R 0.698; 17 G 0.724; 18 L 0.771; 19 R 0.772; 20 E 0.711; 21 L 0.866; 22 R 0.699; 23 S 0.677; 24 P 0.676; 25 L 0.799; 26 I 0.702; 27 V 0.681; 28 E 0.666; 29 V 0.779; 30 E 0.787; 31 R 0.708; 32 G 0.682; 33 A 0.788; 34 A 0.782; …	7.935e-06	0.00218099
TRINITY_DN80079_c3_g2_i2	PREDICTED: uncharacterized protein LOC108682775 [Hyalella azteca]	8 V 0.544; 9 G 0.964*; 15 S 0.813; 18 T 0.902; 22 S 0.972*; 23 T 0.681; 26 S 0.923; 28 A 0.510; 52 Q 0.914; 55 Q 0.929; 96 T 0.911; 102 S 0.972*; 103 D 0.889; 104 T 0.907; 146 R 0.916; 181 Q 0.854; 227 T 0.884; 229 P 0.969*; 231 T 0.809; 264 H 0.675; 265 I 0.978*; 266 S 0.984*; 268 A 0.555; 287 L 0.631; 291 H 0.715; 302 K 0.929; 306 D 0.685; 315 S 0.970*; 335 A 0.910; 336 K 0.955*; 338 V 0.977*; …	1.1405e-05	0.00292576
TRINITY_DN81699_c3_g2_i1	Zona pellucida sperm-binding protein 3 receptor [Armadillidium vulgare]	2 L 0.599; 3 D 0.829; 5 A 0.769; 7 L 0.517; 17 S 0.559; 19 L 0.757; 21 A 0.917; 22 N 0.650; 25 G 0.620; 32 P 0.763; 33 D 0.822; 34 S 0.939; 37 Q 0.979*; 38 I 0.934; 39 G 0.713; 44 I 0.864; 48 G 0.791; 49 M 0.919; 51 I 0.539; 53 K 0.700; 54 Y 0.982*; 60 T 0.744; 63 N 0.589; 68 K 0.513; 73 R 0.902; 79 E 0.980*; 80 S 0.955*; 86 T 0.579; 90 V 0.874; 96 Y 0.879; 100 G 0.974*; 102 T 0.525; 103 L 0.685;…	1.4104e-05	0.00339201
TRINITY_DN83750_c6_g1_i1	PREDICTED: calcium-activated chloride channel regulator 4A-like [Hyalella azteca]	10 M 0.536; 13 P 0.870; 21 S 0.802; 22 P 0.778; 27 I 0.523; 30 A 0.603; 51 E 0.580; 67 M 0.577; 78 R 0.774; 81 H 0.710; 83 D 0.765; 85 T 0.746; 87 E 0.694; 100 Q 0.824; 102 S 0.829; 105 T 0.708; 124 P 0.605; 145 A 0.704; 150 V 0.764; 171 T 0.515; 185 L 0.648; 197 S 0.575; 211 E 0.795; 212 D 0.566; 219 P 0.504; 226 S 0.735; 241 Q 0.609; 287 S 0.817; 290 R 0.617; 310 D 0.643; 311 L 0.707; 316 P 0.7…	1.7052e-05	0.0038185
TRINITY_DN81691_c1_g1_i1	PREDICTED: U3 small nucleolar RNA-associated protein 4 homolog [Hyalella azteca]	2 T 0.644; 4 N 0.890; 6 V 0.516; 7 V 0.517; 8 L 0.687; 12 Q 0.699; 14 M 0.964*; 17 R 0.926; 20 L 0.893; 24 L 0.781; 29 K 0.620; 30 S 0.697; 32 L 0.533; 48 L 0.877; 58 P 0.944; 62 A 0.943; 67 R 0.617; 84 H 0.674; 85 S 0.957*; 94 G 0.923; 96 H 0.914; 97 V 0.603; 99 V 0.586; 100 T 0.725; 103 A 0.653; 106 S 0.942; 111 A 0.711; 115 L 0.705; 120 T 0.805; 122 G 0.561; 128 L 0.965*; 137 N 0.971*; 138 D 0…	1.7862e-05	0.0038185
TRINITY_DN89086_c0_g2_i2	PREDICTED: uncharacterized protein LOC108668403 isoform X2 [Hyalella azteca]	2 A 0.831; 9 T 0.808; 16 S 0.859; 18 T 0.557; 22 P 0.945; 31 N 0.727; 37 N 0.886; 41 V 0.562; 46 Q 0.910; 56 E 0.873; 61 S 0.969*; 63 A 0.923; 81 S 0.963*; 98 S 0.913; 111 G 0.538; 124 T 0.930; 126 E 0.604; 127 S 0.554; 133 K 0.901; 136 V 0.931; 137 S 0.787; 159 L 0.677; 161 Q 0.649; 165 E 0.955*; 170 R 0.959*; 179 P 0.505; 186 V 0.556; 190 S 0.965*; 204 G 0.559; 215 F 0.501; 222 T 0.913; 223 F 0…	4.029e-05	0.00596292
TRINITY_DN88609_c1_g1_i1	PREDICTED: nucleolar protein 6-like [Hyalella azteca]	2 P 0.786; 9 K 0.701; 17 D 0.905; 18 S 0.578; 19 G 0.924; 31 D 0.581; 36 R 0.934; 38 L 0.881; 40 H 0.657; 42 D 0.660; 45 S 0.628; 57 E 0.969*; 59 R 0.648; 64 R 0.528; 68 T 0.930; 72 L 0.666; 73 L 0.936; 79 I 0.672; 85 S 0.977*; 86 S 0.961*; 99 T 0.966*; 107 A 0.528; 115 C 0.975*; 117 T 0.956*; 121 T 0.511; 123 N 0.680; 126 Q 0.638; 133 N 0.883; 137 S 0.625; 145 N 0.941; 160 H 0.703; 161 N 0.923; …	3.9447e-05	0.00596292
TRINITY_DN79048_c0_g1_i1	PREDICTED: uncharacterized protein LOC108669517 isoform X1 [Hyalella azteca]	2 S 0.844; 19 P 0.509; 40 A 0.708; 46 V 0.756; 61 I 0.611; 65 G 0.688; 107 N 0.661; 115 S 0.859; 117 E 0.867; 134 Q 0.783; 146 K 0.539; 162 Y 0.850; 170 E 0.787; 171 L 0.746; 180 P 0.726; 181 R 0.792; 204 Y 0.503; 211 L 0.881; 215 S 0.778; 218 T 0.634; 219 I 0.657; 252 K 0.568; 254 S 0.786; 259 Y 0.790; 264 S 0.854; 267 K 0.513; 273 S 0.828; 284 R 0.831; 291 N 0.769; 295 E 0.684; 322 G 0.781; 324…	3.8064e-05	0.00596292
TRINITY_DN88426_c3_g2_i3	PREDICTED: uncharacterized protein LOC108673809 [Hyalella azteca]	6 H 0.840; 10 V 0.808; 22 M 0.649; 127 A 0.874; 128 A 0.807; 154 S 0.851; 192 V 0.714; 197 K 0.835; 203 T 0.800; 211 S 0.571; 234 S 0.894; 235 T 0.618; 239 D 0.747; 241 K 0.507; 242 S 0.572; 244 K 0.850; 247 D 0.811; 249 T 0.587; 250 N 0.862; 273 N 0.778; 278 G 0.905; 284 K 0.581; 292 L 0.664; 300 G 0.829; 308 P 0.877; 311 G 0.820; 312 A 0.884; 313 K 0.779; 316 S 0.877; 320 G 0.890; 323 Q 0.915; …	3.7823e-05	0.00596292
TRINITY_DN80346_c0_g1_i4	hypothetical protein C7M84_008024 [Penaeus vannamei]	1 M 0.903; 3 T 0.713; 6 A 0.748; 9 Q 0.666; 10 C 0.995**; 16 A 0.996**; 17 A 0.897; 19 A 0.719; 20 E 0.589; 24 E 0.580; 26 V 0.808; 27 A 0.753; 28 N 0.899; 29 N 0.805; 33 S 0.961*; 35 I 0.757; 37 S 0.996**; 38 G 0.981*; 40 S 0.973*; 43 A 0.997**; 44 L 0.761; 45 S 0.962*; 46 M 0.981*; 47 P 0.908; 50 E 0.789; 52 A 0.995**; 53 Q 0.997**; 54 L 0.933; 56 D 0.960*; 58 V 0.990*; 64 F 0.773; 69 S 0.803; …	3.6031e-05	0.00596292
TRINITY_DN81717_c6_g1_i2	NA	1 R 0.667; 9 E 0.755; 10 H 0.750; 13 K 0.876; 19 S 0.880; 21 T 0.781; 22 S 0.543; 28 E 0.843; 32 S 0.820; 33 R 0.944; 38 T 0.614; 39 N 0.921; 45 K 0.555; 48 S 0.944; 54 N 0.556; 56 S 0.619; 57 F 0.898; 58 A 0.537; 59 L 0.576; 65 K 0.833; 66 S 0.829; 71 S 0.877; 77 I 0.696; 79 G 0.942; 97 V 0.602; 104 K 0.694; 111 D 0.695; 114 H 0.698; 117 Q 0.842; 119 Y 0.890; 120 A 0.806; 125 S 0.593; 127 S 0.94…	3.6253e-05	0.00596292
TRINITY_DN86074_c3_g3_i1	PREDICTED: ribosomal L1 domain-containing protein CG13096-like [Hyalella azteca]	4 K 0.539; 6 T 0.647; 7 T 0.973*; 12 S 0.981*; 16 I 0.662; 22 S 0.623; 30 C 0.940; 35 A 0.976*; 36 P 0.983*; 40 D 0.733; 52 G 0.722; 56 L 0.677; 65 V 0.619; 69 E 0.564; 70 L 0.505; 74 H 0.512; 82 R 0.951*; 92 S 0.895; 94 H 0.952*; 95 T 0.501; 96 A 0.601; 107 K 0.969*; 111 A 0.533; 146 K 0.607; 148 T 0.596; 154 D 0.944; 163 S 0.894; 176 E 0.971*; 179 Q 0.795; 186 S 0.642; 189 L 0.804; 195 V 0.791;…	3.7602e-05	0.00596292
TRINITY_DN85679_c0_g1_i5	PREDICTED: leucine-rich repeat and death domain-containing protein 1-like isoform X1 [Hyalella azteca] &gt;XP_018011271.1 PREDICTED: leucine-rich repeat and death domain-containing protein 1-like isoform X1 [Hyalella azteca] &gt;XP_018011272.1 PREDICTED: leucine-rich repeat and death domain-containing protein 1-like isoform X1 [Hyalella azteca]	1 M 0.678; 2 R 0.694; 3 I 0.677; 4 N 0.683; 5 C 0.703; 6 N 0.912; 7 V 0.738; 8 T 0.733; 9 V 0.822; 10 M 0.939; 11 N 0.880; 12 R 0.694; 13 S 0.859; 14 L 0.733; 15 H 0.903; 16 G 0.768; 17 S 0.691; 18 A 0.830; 19 M 0.896; 20 R 0.706; 21 F 0.850; 22 P 0.739; 23 V 0.788; 24 P 0.733; 25 L 0.786; 26 R 0.715; 27 S 0.823; 28 S 0.819; 29 L 0.746; 30 G 0.742; 31 V 0.865; 32 G 0.697; 33 Q 0.763; 34 S 0.771; …	3.4288e-05	0.00596292
TRINITY_DN84618_c2_g3_i1	NA	3 Y 0.612; 4 R 0.693; 17 A 0.835; 19 S 0.889; 23 L 0.519; 24 P 0.984*; 28 G 0.971*; 29 G 0.927; 40 A 0.893; 42 E 0.521; 86 T 0.672; 89 S 0.703; 132 M 0.705; 134 S 0.874; 153 I 0.505; 164 S 0.981*; 169 D 0.525; 172 A 0.687; 174 N 0.570; 191 S 0.629; 194 P 0.986*; 195 I 0.978*; 199 Q 0.936; 200 S 0.986*; 203 S 0.940; 205 S 0.594; 209 S 0.956*; 211 A 0.600; 217 T 0.834; 218 A 0.626; 220 A 0.662; 221…	5.718e-05	0.00814921
TRINITY_DN88915_c3_g2_i8	PREDICTED: UBX domain-containing protein 4-like [Hyalella azteca]	1 E 0.640; 2 T 0.672; 3 T 0.669; 13 E 0.951*; 14 E 0.591; 15 T 0.668; 23 A 0.937; 25 A 0.740; 29 V 0.661; 36 T 0.674; 49 N 0.958*; 52 V 0.516; 56 E 0.591; 58 L 0.521; 60 Q 0.598; 69 Q 0.664; 70 L 0.681; 88 K 0.937; 95 L 0.644; 97 S 0.978*; 98 L 0.547; 101 Q 0.598; 108 D 0.986*; 110 K 0.546; 111 A 0.930; 114 Q 0.670; 115 A 0.937; 116 I 0.654; 119 K 0.582; 125 E 0.654; 128 T 0.940; 133 I 0.785; 138…	6.7458e-05	0.00927066
TRINITY_DN80304_c0_g1_i2	probable ATP-dependent RNA helicase DDX27 [Aedes aegypti] &gt;EAT37719.1 AAEL010317-PA [Aedes aegypti]	6 G 0.902; 8 N 0.510; 12 A 0.926; 17 N 0.597; 22 I 0.535; 26 Q 0.894; 29 N 0.939; 32 V 0.938; 37 E 0.613; 45 L 0.520; 46 P 0.938; 52 A 0.971*; 64 F 0.824; 95 S 0.615; 97 Q 0.599; 124 I 0.902; 127 T 0.594; 130 Q 0.594; 145 M 0.921; 146 M 0.589; 147 T 0.633; 150 S 0.533; 155 E 0.529; 157 R 0.730; 163 A 0.961*; 166 G 0.724; 169 T 0.515; 175 A 0.569; 202 M 0.939; 211 C 0.989*; 215 P 0.673; 216 A 0.56…	9.0045e-05	0.0097085
TRINITY_DN85184_c6_g2_i4	PREDICTED: plastin-1-like [Hyalella azteca]	NA	8.845e-05	0.0097085
TRINITY_DN84930_c2_g1_i8	PREDICTED: FAD-dependent oxidoreductase domain-containing protein 1-like [Hyalella azteca]	3 S 0.712; 7 H 0.634; 14 R 0.621; 22 N 0.919; 36 Q 0.910; 37 S 0.970*; 47 A 0.752; 51 S 0.818; 54 L 0.506; 56 D 0.660; 66 Y 0.884; 70 T 0.724; 92 P 0.581; 93 D 0.517; 101 S 0.595; 105 K 0.844; 113 I 0.581; 117 T 0.545; 120 H 0.853; 125 D 0.853; 137 I 0.520; 151 T 0.953*; 152 G 0.897; 162 N 0.618; 165 H 0.849; 182 L 0.684; 211 V 0.876; 257 K 0.900; 260 W 0.871; 309 L 0.757; 317 V 0.793; 318 S 0.90…	8.3692e-05	0.0097085
TRINITY_DN79050_c0_g1_i1	39S ribosomal protein L44, mitochondrial-like [Penaeus vannamei]	3 L 0.591; 7 W 0.979*; 8 S 0.940; 9 K 0.835; 13 Q 0.757; 14 Q 0.592; 15 S 0.717; 25 S 0.560; 26 P 0.899; 29 N 0.526; 30 R 0.781; 32 T 0.898; 33 S 0.940; 40 A 0.905; 43 M 0.525; 46 R 0.924; 47 Q 0.774; 49 A 0.924; 51 D 0.922; 52 I 0.908; 94 T 0.752; 96 A 0.817; 100 K 0.958*; 109 H 0.525; 114 N 0.858; 116 T 0.550; 118 P 0.684; 120 E 0.931; 124 A 0.551; 129 R 0.607; 133 I 0.568; 136 T 0.826; 144 V 0…	8.4468e-05	0.0097085
TRINITY_DN73941_c0_g2_i1	PREDICTED: leucine-rich PPR motif-containing protein, mitochondrial-like [Hyalella azteca]	19 G 0.683; 23 S 0.824; 53 G 0.628; 55 P 0.687; 83 I 0.657; 91 L 0.722; 102 K 0.689; 112 N 0.636; 128 L 0.708; 160 A 0.556; 161 K 0.689; 166 Q 0.626; 223 K 0.792; 233 E 0.740; 235 A 0.645; 271 D 0.740; 277 A 0.749; 289 N 0.718; 292 A 0.744; 300 D 0.747; 301 A 0.633; 307 Y 0.610; 318 K 0.734; 324 Q 0.780; 333 K 0.515; 336 P 0.831; 341 T 0.571; 344 V 0.627; 349 C 0.578; 359 K 0.569; 375 Q 0.766; 37…	9.0828e-05	0.0097085
TRINITY_DN84189_c1_g1_i1	NA	40 S 0.870; 63 S 0.501; 64 S 0.645; 67 T 0.540; 78 I 0.715; 93 P 0.532; 96 S 0.846; 97 N 0.850; 101 S 0.848; 102 N 0.803; 104 N 0.657; 105 P 0.600; 106 L 0.507; 132 R 0.820; 135 E 0.656; 152 P 0.856; 166 S 0.686; 167 I 0.507; 177 L 0.617; 183 Q 0.542; 186 D 0.603; 208 T 0.574; 212 R 0.721; 222 D 0.707; 231 T 0.581; 253 M 0.656; 255 S 0.769; 262 E 0.761; 267 V 0.647; 344 L 0.889; 376 T 0.614; 381 …	8.844e-05	0.0097085
TRINITY_DN78892_c0_g1_i3	PREDICTED: alkylated DNA repair protein alkB homolog 8-like isoform X1 [Hyalella azteca]	16 A 0.907; 17 A 0.842; 65 T 0.641; 67 S 0.778; 78 L 0.512; 90 S 0.561; 101 E 0.863; 119 K 0.942; 120 D 0.683; 128 A 0.838; 138 H 0.745; 141 T 0.839; 171 S 0.827; 179 G 0.888; 181 A 0.821; 189 L 0.943; 206 S 0.959*; 208 K 0.886; 214 Q 0.708; 218 T 0.512; 221 S 0.568; 226 T 0.857; 235 L 0.554; 246 R 0.837; 271 F 0.736; 273 S 0.884; 293 S 0.950*; 302 Q 0.866; 360 C 0.770; 374 K 0.791; 376 K 0.843; …	8.3481e-05	0.0097085
TRINITY_DN83969_c0_g1_i3	PREDICTED: uncharacterized AAA domain-containing protein C16E9.10c-like [Hyalella azteca]	1 M 0.608; 2 K 0.626; 3 D 0.615; 4 N 0.814; 5 R 0.760; 6 A 0.734; 7 P 0.668; 8 Y 0.663; 9 F 0.634; 10 L 0.663; 11 N 0.814; 12 N 0.815; 13 S 0.656; 14 L 0.659; 15 L 0.808; 16 D 0.719; 17 A 0.662; 18 V 0.661; 19 K 0.815; 20 E 0.697; 21 Y 0.642; 22 C 0.766; 23 E 0.621; 24 Q 0.682; 25 H 0.653; 26 V 0.814; 27 S 0.678; 28 V 0.707; 29 D 0.639; 30 L 0.655; 31 D 0.638; 32 F 0.723; 33 M 0.612; 34 T 0.631; …	8.6252e-05	0.0097085
TRINITY_DN81939_c4_g2_i3	PREDICTED: uncharacterized protein LOC108671982 [Hyalella azteca]	1 E 0.835; 2 E 0.779; 3 N 0.733; 4 I 0.791; 5 L 0.849; 6 T 0.796; 7 F 0.840; 8 S 0.741; 9 I 0.736; 10 A 0.754; 11 S 0.757; 12 L 0.846; 13 T 0.749; 14 T 0.850; 15 A 0.754; 16 V 0.848; 17 V 0.785; 18 Y 0.782; 19 N 0.836; 20 L 0.782; 21 F 0.805; 22 R 0.787; 23 V 0.800; 24 S 0.793; 25 S 0.742; 26 D 0.802; 27 Q 0.772; 28 E 0.807; 29 Q 0.755; 30 H 0.803; 31 S 0.837; 32 D 0.735; 33 S 0.806; 34 T 0.798; …	9.8806e-05	0.0102758
TRINITY_DN84500_c2_g3_i1	PREDICTED: DEAD-box ATP-dependent RNA helicase 20-like [Hyalella azteca]	5 Q 0.807; 14 L 0.622; 23 S 0.917; 26 I 0.668; 29 Q 0.830; 32 S 0.897; 34 V 0.929; 35 G 0.550; 38 G 0.830; 43 L 0.858; 52 S 0.561; 61 Q 0.849; 72 R 0.921; 85 D 0.883; 109 S 0.868; 121 R 0.940; 123 E 0.504; 133 R 0.617; 136 D 0.845; 142 K 0.814; 146 Q 0.608; 154 L 0.714; 156 E 0.900; 157 S 0.937; 167 L 0.501; 178 S 0.952*; 193 A 0.854; 218 I 0.753; 257 S 0.913; 258 K 0.861; 260 L 0.620; 262 R 0.85…	0.000104699	0.0106022
TRINITY_DN85644_c2_g4_i1	NA	1 A 0.774; 2 A 0.608; 7 A 0.970*; 17 T 0.994**; 19 H 0.986*; 32 T 0.706; 37 S 0.996**; 40 S 0.996**; 41 A 0.788; 45 R 0.653; 69 N 0.992**; 72 I 0.981*; 80 A 0.839; 81 T 0.985*; 82 S 0.998**; 84 S 0.970*; 86 L 0.753; 88 S 0.995**; 90 G 0.978*; 93 T 0.994**; 95 S 0.986*; 98 L 0.903	0.000112349	0.0110851
TRINITY_DN87778_c0_g1_i2	UPF0415 protein C7orf25 homolog [Penaeus vannamei]	1 A 0.718; 4 S 0.728; 5 M 0.822; 8 L 0.913; 9 V 0.565; 10 N 0.886; 13 V 0.517; 15 S 0.828; 24 C 0.960*; 25 C 0.962*; 26 T 0.857; 35 G 0.821; 36 L 0.837; 39 R 0.951*; 41 I 0.601; 60 Y 0.825; 63 I 0.552; 64 M 0.708; 79 V 0.854; 83 P 0.749; 88 L 0.614; 92 Y 0.571; 96 N 0.939; 97 A 0.622; 98 L 0.643; 128 H 0.787; 137 C 0.943; 150 G 0.535; 151 G 0.945; 152 S 0.894; 153 P 0.605; 155 M 0.688; 157 E 0.91…	0.0001254	0.0117692
TRINITY_DN83075_c0_g1_i5	PREDICTED: uncharacterized protein LOC108678306 [Hyalella azteca]	2 K 0.923; 4 V 0.527; 5 V 0.915; 6 G 0.971*; 14 P 0.583; 16 I 0.743; 31 M 0.983*; 32 A 0.776; 40 S 0.977*; 43 A 0.560; 46 N 0.958*; 49 T 0.896; 52 R 0.606; 54 S 0.797; 55 Q 0.839; 60 S 0.703; 61 G 0.975*; 63 R 0.984*; 64 P 0.735; 65 R 0.885; 69 L 0.672; 71 Q 0.962*; 72 Q 0.788; 80 G 0.647; 81 I 0.718; 84 M 0.723; 100 V 0.934; 103 S 0.555; 119 C 0.983*; 129 G 0.537; 136 G 0.597; 151 I 0.945; 155 S…	0.000124535	0.0117692
TRINITY_DN81779_c0_g2_i1	PREDICTED: uncharacterized protein LOC108665326 isoform X1 [Hyalella azteca]	10 G 0.538; 13 Q 0.841; 14 P 0.837; 22 N 0.601; 27 V 0.557; 33 Q 0.589; 39 T 0.657; 40 F 0.652; 43 T 0.824; 46 Q 0.528; 47 I 0.569; 49 L 0.545; 50 K 0.908; 53 L 0.756; 61 L 0.835; 63 T 0.684; 67 V 0.727; 70 H 0.681; 72 S 0.932; 100 K 0.528; 108 I 0.591; 117 E 0.544; 130 L 0.791; 131 N 0.625; 139 M 0.839; 140 N 0.579; 141 N 0.890; 145 Q 0.844; 146 C 0.537; 148 T 0.923; 156 G 0.866; 170 Y 0.791; 17…	0.000129904	0.0118194
TRINITY_DN88194_c1_g1_i10	PREDICTED: protein transport protein Sec31A-like isoform X2 [Hyalella azteca]	45 P 0.683; 48 G 0.779; 50 Q 0.525; 52 C 0.958*; 56 A 0.903; 63 E 0.929; 121 A 0.566; 125 Y 0.961*; 130 R 0.958*; 136 P 0.542; 137 A 0.544; 150 V 0.511; 158 S 0.697; 169 V 0.633; 172 S 0.745; 175 N 0.927; 176 D 0.923; 185 T 0.581; 187 H 0.623; 191 E 0.611; 197 E 0.609; 208 T 0.500; 215 Q 0.981*; 216 S 0.903; 241 V 0.560; 272 A 0.552; 273 G 0.678; 285 S 0.729; 300 S 0.781; 307 T 0.583; 311 K 0.967…	0.000132078	0.0118194
TRINITY_DN82263_c5_g1_i1	PREDICTED: carnitine O-palmitoyltransferase 2, mitochondrial-like [Hyalella azteca]	5 L 0.991**; 6 L 0.593; 8 G 0.830; 16 R 0.708; 22 L 0.658; 26 S 0.747; 46 N 0.959*; 86 S 0.786; 98 T 0.615; 109 E 0.949; 152 V 0.796; 162 A 0.944; 174 H 0.981*; 199 Q 0.973*; 203 Q 0.923; 204 F 0.972*; 209 S 0.970*; 212 I 0.843; 235 L 0.822; 242 C 0.956*; 244 K 0.950; 247 R 0.673; 263 I 0.542; 265 G 0.856; 268 D 0.690; 279 I 0.682; 286 K 0.987*; 291 Q 0.745; 304 V 0.847; 310 Q 0.919; 322 A 0.932;…	0.000141158	0.0123449
TRINITY_DN80658_c2_g2_i2	Glutathione S-transferase kappa 1 [Armadillidium vulgare]	1 S 0.812; 2 C 0.729; 3 L 0.790; 4 A 0.729; 5 S 0.825; 6 C 0.707; 7 R 0.811; 8 A 0.814; 9 D 0.798; 10 T 0.810; 11 L 0.778; 12 C 0.717; 13 W 0.726; 14 R 0.724; 15 E 0.883; 16 H 0.706; 17 H 0.693; 18 P 0.803; 19 A 0.794; 20 T 0.783; 21 H 0.749; 22 T 0.787; 23 A 0.780; 24 S 0.719; 25 S 0.684; 26 S 0.835; 27 R 0.720; 28 Q 0.813; 29 L 0.717; 30 H 0.682; 31 T 0.691; 32 T 0.730; 33 Q 0.853; 34 G 0.795; …	0.000169652	0.0145071
TRINITY_DN83927_c5_g4_i2	PREDICTED: septin-1-like isoform X2 [Hyalella azteca]	306 S 0.740; 310 M 0.627; 320 S 0.796; 322 A 0.762	0.000182342	0.0152533
TRINITY_DN86862_c3_g2_i4	PREDICTED: ubiquitin-protein ligase E3C-like [Hyalella azteca]	7 L 0.977*; 10 G 0.882; 19 G 0.937; 27 M 0.877; 34 S 0.947; 37 V 0.735; 39 M 0.927; 41 H 0.883; 45 R 0.531; 47 V 0.526; 50 F 0.636; 51 I 0.621; 55 L 0.679; 83 D 0.930; 86 T 0.555; 88 T 0.629; 90 D 0.585; 98 C 0.988*; 107 Q 0.582; 109 R 0.921; 130 S 0.561; 133 Q 0.985*; 139 A 0.935; 163 T 0.984*; 176 R 0.781; 177 H 0.940; 183 Y 0.925; 184 V 0.538; 205 I 0.641; 210 L 0.865; 215 Y 0.981*; 218 F 0.62…	0.000209916	0.0158384
TRINITY_DN83551_c0_g3_i2	PREDICTED: leukocyte elastase inhibitor-like [Hyalella azteca]	NA	0.000200933	0.0158384
TRINITY_DN87527_c4_g2_i3	PREDICTED: putative GTP-binding protein 6 [Hyalella azteca]	1 K 0.815; 3 P 0.950*; 8 R 0.635; 11 N 0.537; 16 C 0.574; 20 E 0.509; 28 Y 0.710; 30 V 0.604; 34 S 0.980*; 35 S 0.956*; 51 G 0.969*; 53 Q 0.982*; 55 Q 0.591; 62 N 0.941; 76 K 0.839; 80 Q 0.946; 82 I 0.653; 95 K 0.619; 97 A 0.549; 99 A 0.667; 121 D 0.783; 122 A 0.572; 139 K 0.956*; 142 R 0.628; 146 I 0.550; 150 E 0.964*; 151 V 0.507; 162 V 0.523; 163 E 0.909; 166 K 0.982*; 167 G 0.969*; 184 I 0.65…	0.000207412	0.0158384
TRINITY_DN79520_c0_g1_i1	PREDICTED: carbonic anhydrase-like, partial [Hyalella azteca]	3 H 0.828; 16 G 0.937; 38 D 0.689; 66 D 0.910; 80 N 0.882; 92 F 0.783; 94 F 0.944; 126 L 0.877; 138 P 0.902; 213 S 0.959*	0.00019646	0.0158384
TRINITY_DN87984_c1_g2_i1	PREDICTED: transcription factor Sp1-like [Hyalella azteca]	5 T 0.557; 6 T 0.706; 26 K 0.908; 35 A 0.927; 48 A 0.910; 68 D 0.527; 71 A 0.529; 75 S 0.968*; 90 Q 0.727; 92 R 0.595; 95 T 0.693; 100 M 0.913; 104 S 0.967*; 111 C 0.829; 116 S 0.995**; 128 G 0.838; 129 S 0.547; 134 G 0.737; 137 L 0.625; 143 T 0.927; 159 S 0.906; 165 Y 0.963*; 166 R 0.976*; 167 G 0.803; 168 G 0.974*; 169 G 0.609; 173 K 0.921; 185 S 0.979*; 190 A 0.561; 197 L 0.893; 212 M 0.728; 2…	0.000206742	0.0158384
TRINITY_DN82562_c0_g1_i2	PREDICTED: plasminogen-like [Hyalella azteca]	NA	0.000251197	0.0185886
TRINITY_DN80907_c5_g2_i1	NA	2 P 0.676; 6 G 0.624; 15 L 0.545; 19 S 0.705; 22 S 0.801; 23 A 0.683; 24 S 0.971*; 37 S 0.985*; 38 R 0.969*; 39 F 0.968*; 47 V 0.627; 58 T 0.877; 64 S 0.969*; 65 K 0.960*; 67 K 0.960*; 73 S 0.639; 74 N 0.764; 77 A 0.969*; 78 K 0.980*; 84 P 0.637; 91 F 0.563; 106 V 0.536; 110 V 0.665; 133 H 0.944; 155 S 0.969*; 167 I 0.696; 168 S 0.981*; 192 S 0.613; 208 T 0.546	0.000290759	0.0194671
TRINITY_DN84710_c0_g1_i12	WD repeat domain phosphoinositide-interacting protein 2-like isoform X3 [Penaeus vannamei]	21 D 0.729; 25 M 0.573; 43 L 0.826; 74 P 0.887; 83 S 0.912; 85 P 0.987*; 86 R 0.770; 96 E 0.957*; 104 D 0.661; 121 F 0.824; 129 N 0.975*; 130 N 0.637; 138 S 0.960*; 140 D 0.977*; 161 G 0.968*; 164 A 0.917; 167 P 0.800; 169 I 0.799	0.000291818	0.0194671
TRINITY_DN86761_c18_g1_i1	PREDICTED: NADH-quinone oxidoreductase subunit B-like [Hyalella azteca]	4 L 0.787; 7 R 0.974*; 14 S 0.954*; 15 M 0.945; 17 M 0.820; 23 C 0.970*; 27 G 0.961*; 31 A 0.864; 33 S 0.984*; 34 K 0.975*; 36 P 0.967*; 37 P 0.972*; 48 S 0.825; 49 S 0.975*; 68 S 0.989*; 127 L 0.992**; 133 A 0.654; 140 S 0.994**	0.000278653	0.0194671
TRINITY_DN82296_c0_g1_i4	PREDICTED: flocculation protein FLO11-like isoform X1 [Hyalella azteca]	3 V 0.555; 4 P 0.981*; 12 H 0.547; 20 G 0.570; 25 N 0.539; 26 C 0.670; 30 T 0.596; 32 A 0.908; 34 S 0.913; 37 S 0.929; 39 H 0.657; 40 Q 0.951*; 44 N 0.928; 46 F 0.703; 50 G 0.960*; 54 Q 0.668; 55 S 0.677; 57 N 0.894; 61 T 0.951*; 64 T 0.526; 67 S 0.967*; 71 S 0.627; 72 L 0.751; 73 S 0.600; 77 S 0.956*; 81 T 0.628; 85 A 0.945; 90 T 0.926; 98 T 0.574; 103 V 0.521; 104 T 0.791; 111 A 0.611; 115 S 0.…	0.000280606	0.0194671
TRINITY_DN86034_c5_g1_i1	PREDICTED: lanC-like protein 3 [Hyalella azteca]	7 S 0.611; 146 D 0.728	0.000291187	0.0194671
TRINITY_DN85534_c8_g2_i1	NA	10 S 0.612; 15 R 0.790; 25 T 0.636; 35 Q 0.532; 43 P 0.786; 52 S 0.842; 53 D 0.806; 56 S 0.848; 58 A 0.815; 59 A 0.558; 62 Q 0.674; 80 S 0.633; 82 S 0.836; 85 G 0.780; 98 D 0.582; 104 Y 0.762; 107 K 0.516; 115 D 0.633; 132 I 0.829; 136 E 0.606; 163 S 0.948; 166 E 0.726; 168 I 0.782; 169 L 0.579; 170 S 0.878; 180 Y 0.667; 188 S 0.810; 198 P 0.613; 199 S 0.676; 202 S 0.509; 206 K 0.811; 212 V 0.587…	0.000294757	0.0194671
TRINITY_DN88555_c1_g1_i5	Alkylated DNA repair protein alkB-like protein 7 [Penaeus vannamei]	3 I 0.727; 4 L 0.865; 10 S 0.954*; 13 V 0.918; 14 N 0.754; 17 P 0.591; 20 S 0.513; 25 S 0.568; 29 V 0.610; 32 G 0.875; 33 L 0.530; 35 V 0.526; 39 P 0.574; 42 T 0.648; 49 A 0.515; 54 K 0.502; 58 E 0.578; 62 S 0.528; 63 V 0.523; 71 N 0.868; 73 N 0.529; 74 N 0.587; 77 S 0.771; 82 R 0.814; 84 R 0.886; 87 H 0.821; 96 R 0.574; 103 E 0.843; 104 L 0.574; 128 Q 0.704; 133 S 0.919; 145 L 0.849; 148 S 0.935…	0.000303541	0.0194671
TRINITY_DN88945_c3_g4_i1	RNA polymerase II subunit B1 CTD phosphatase Rpap2-like [Penaeus vannamei] &gt;XP_027224857.1 RNA polymerase II subunit B1 CTD phosphatase Rpap2-like [Penaeus vannamei]	2 Y 0.720; 5 A 0.575; 21 V 0.757; 29 S 0.967*; 32 T 0.590; 41 A 0.917; 48 K 0.866; 50 A 0.816; 55 S 0.619; 58 H 0.606; 59 L 0.956*; 62 V 0.502; 63 T 0.849; 79 R 0.666; 94 S 0.750; 108 P 0.707; 111 V 0.821; 112 T 0.568; 117 R 0.711; 119 T 0.913; 120 Y 0.822; 122 I 0.563; 127 L 0.513; 131 A 0.655; 147 L 0.574; 149 Q 0.675; 151 R 0.510; 155 L 0.756; 162 G 0.915; 165 Q 0.745; 167 N 0.605; 169 T 0.669…	0.000298512	0.0194671
TRINITY_DN87697_c0_g1_i3	PREDICTED: uncharacterized protein LOC108664297 [Hyalella azteca]	11 I 0.906; 13 S 0.903; 31 I 0.562; 34 Y 0.962*; 47 K 0.905; 74 R 0.876; 91 A 0.661; 110 D 0.966*; 116 V 0.570; 123 Q 0.952*; 129 Y 0.846; 143 S 0.988*; 145 S 0.964*; 146 T 0.980*; 147 S 0.965*; 148 G 0.903; 156 T 0.748; 173 A 0.726; 175 S 0.616; 177 G 0.506; 180 R 0.930; 184 A 0.880; 188 D 0.502; 190 R 0.905; 194 H 0.780; 197 T 0.957*; 198 L 0.944; 211 P 0.664; 225 S 0.992**; 253 S 0.984*; 260 I…	0.000311486	0.0195234
TRINITY_DN85431_c11_g2_i1	PREDICTED: ribosome biogenesis protein NSA2 homolog [Hyalella azteca] &gt;XP_018018005.1 PREDICTED: ribosome biogenesis protein NSA2 homolog [Hyalella azteca]	NA	0.000314566	0.0195234
TRINITY_DN82303_c2_g1_i2	PREDICTED: probable E3 ubiquitin-protein ligase makorin-1 [Hyalella azteca]	6 D 0.914; 7 V 0.524; 9 Q 0.789; 10 S 0.960*; 11 R 0.648; 39 S 0.961*; 40 N 0.958*; 46 M 0.934; 47 N 0.887; 54 S 0.981*; 61 I 0.508; 66 S 0.980*; 68 Q 0.925; 69 A 0.682; 74 P 0.960*; 78 Q 0.756; 79 H 0.904; 80 Q 0.927; 81 Q 0.971*; 82 Q 0.978*; 84 R 0.930; 86 P 0.559; 87 K 0.721; 96 K 0.918; 98 G 0.918; 102 S 0.530; 107 I 0.512; 111 S 0.959*; 115 S 0.954*; 120 G 0.930; 134 Q 0.527; 135 C 0.622; 1…	0.000325717	0.0198946
TRINITY_DN85721_c2_g1_i1	PREDICTED: digestive organ expansion factor homolog [Hyalella azteca]	2 P 0.736; 8 T 0.962*; 9 G 0.969*; 11 R 0.679; 13 R 0.504; 15 R 0.766; 16 G 0.546; 17 G 0.619; 18 A 0.719; 22 N 0.904; 24 N 0.904; 26 T 0.660; 27 F 0.980*; 32 H 0.551; 33 D 0.795; 35 Q 0.836; 40 S 0.958*; 45 E 0.820; 46 A 0.821; 51 S 0.976*; 54 S 0.984*; 55 E 0.944; 56 Q 0.547; 57 E 0.969*; 59 P 0.768; 61 T 0.807; 63 S 0.953*; 64 L 0.506; 67 N 0.931; 73 S 0.943; 75 G 0.732; 78 V 0.598; 79 S 0.693…	0.000343456	0.0203456
TRINITY_DN83274_c3_g1_i10	PREDICTED: beta-1,4-galactosyltransferase 1-like [Hyalella azteca]	6 V 0.927; 28 S 0.930; 31 Y 0.765; 38 S 0.944; 39 K 0.916; 45 T 0.922; 49 T 0.541; 52 R 0.562; 63 T 0.571; 69 E 0.692; 81 Q 0.941; 84 K 0.781; 85 L 0.904; 88 T 0.716; 95 F 0.902; 98 T 0.544; 99 F 0.964*; 100 R 0.519; 129 A 0.545; 147 V 0.612; 151 I 0.555; 160 A 0.929; 175 S 0.643; 176 Q 0.864; 177 L 0.560; 179 L 0.579; 183 V 0.778; 199 S 0.979*; 236 V 0.619; 237 L 0.622; 239 E 0.647; 256 A 0.534;…	0.000343675	0.0203456
TRINITY_DN86370_c2_g3_i1	PREDICTED: acylglycerol kinase, mitochondrial-like [Hyalella azteca]	1 K 0.720; 2 F 0.763; 3 F 0.851; 4 K 0.764; 5 I 0.825; 6 L 0.765; 7 K 0.817; 8 N 0.721; 9 N 0.821; 10 P 0.717; 11 K 0.713; 12 K 0.720; 13 S 0.799; 14 I 0.720; 15 F 0.749; 16 F 0.720; 17 S 0.811; 18 G 0.826; 19 F 0.805; 20 G 0.722; 21 V 0.807; 22 F 0.815; 23 A 0.814; 24 T 0.808; 25 N 0.819; 26 F 0.814; 27 G 0.739; 28 K 0.720; 29 N 0.838; 30 K 0.720; 31 Y 0.721; 32 Q 0.850; 33 E 0.710; 34 E 0.710; …	0.000365581	0.0213145
TRINITY_DN84606_c2_g2_i3	PREDICTED: putative tRNA pseudouridine synthase Pus10 [Hyalella azteca]	1 M 0.748; 2 K 0.851; 3 S 0.829; 4 V 0.772; 5 K 0.865; 6 F 0.848; 7 L 0.763; 8 Q 0.840; 9 E 0.828; 10 I 0.878; 11 G 0.754; 12 C 0.761; 13 C 0.761; 14 P 0.769; 15 R 0.760; 16 C 0.770; 17 V 0.753; 18 L 0.767; 19 V 0.753; 20 H 0.856; 21 C 0.771; 22 F 0.821; 23 V 0.766; 24 R 0.770; 25 D 0.752; 26 T 0.851; 27 D 0.849; 28 H 0.770; 29 Y 0.856; 30 I 0.754; 31 T 0.831; 32 H 0.806; 33 D 0.804; 34 A 0.827; …	0.000372136	0.0213728
TRINITY_DN87378_c2_g2_i1	PREDICTED: conserved oligomeric Golgi complex subunit 7-like isoform X1 [Hyalella azteca]	13 T 0.515; 15 K 0.868; 88 V 0.545; 89 K 0.824; 92 G 0.750; 93 N 0.991**; 94 T 0.500; 95 T 0.800; 96 G 0.937; 101 D 0.607; 114 M 0.735; 115 L 0.531; 117 S 0.562; 130 A 0.928; 147 A 0.528; 197 A 0.798; 208 L 0.980*; 229 L 0.607; 235 Q 0.924; 236 D 0.951*; 237 G 0.960*; 248 T 0.956*; 251 T 0.872; 261 A 0.960*; 269 P 0.539; 282 T 0.986*; 293 S 0.990*; 294 N 0.988*; 296 C 0.964*; 325 V 0.560; 334 S 0…	0.000426644	0.024143
TRINITY_DN60564_c0_g1_i1	PREDICTED: uncharacterized protein LOC108678499 [Hyalella azteca]	3 Y 0.857; 22 G 0.638; 34 R 0.871; 39 S 0.935; 60 N 0.619; 73 Q 0.592; 74 H 0.652; 76 I 0.909; 86 E 0.896; 90 L 0.709; 94 S 0.503; 97 K 0.879; 125 T 0.652; 130 I 0.926; 146 D 0.864; 171 V 0.835; 179 N 0.911; 202 K 0.613; 203 A 0.939; 220 D 0.579; 223 L 0.942; 228 L 0.918; 230 S 0.581; 233 S 0.663; 238 R 0.956*; 239 Y 0.837; 240 S 0.941; 242 T 0.884; 244 R 0.645; 246 S 0.958*; 259 M 0.572; 272 T 0…	0.000438658	0.0244631
TRINITY_DN82893_c2_g1_i3	PREDICTED: uncharacterized protein LOC108683073 [Hyalella azteca]	7 T 0.853; 14 H 0.762; 17 Q 0.862; 19 G 0.732; 23 V 0.900; 30 P 0.915; 31 M 0.563; 34 R 0.734; 39 S 0.921; 40 S 0.560; 41 T 0.523; 42 L 0.913; 43 K 0.917; 44 A 0.630; 45 L 0.847; 48 V 0.892; 49 L 0.710; 51 D 0.917; 52 S 0.890; 53 N 0.706; 55 T 0.618; 56 P 0.934; 58 D 0.531; 60 V 0.916; 61 K 0.927; 67 D 0.748; 68 H 0.935; 69 S 0.820; 71 V 0.835; 73 M 0.917; 76 T 0.680; 81 L 0.710; 88 N 0.804; 90 N…	0.000457932	0.0245565
TRINITY_DN81006_c8_g1_i7	putative protein no-on-transient A-like isoform X2 [Penaeus vannamei]	1 Q 0.968*; 5 S 0.658; 7 S 0.968*; 8 V 0.520; 9 N 0.924; 13 S 0.512; 15 E 0.909; 17 S 0.594; 18 Q 0.935; 20 P 0.639; 23 R 0.605; 25 N 0.905; 34 G 0.944; 40 N 0.943; 41 N 0.931; 50 S 0.966*; 53 K 0.963*; 55 S 0.749; 60 N 0.514; 61 Q 0.705; 62 K 0.894; 63 Q 0.973*; 64 G 0.613; 70 G 0.944; 74 Q 0.943; 79 N 0.603; 81 G 0.538; 86 N 0.929; 91 N 0.530; 92 Q 0.696; 95 G 0.901; 96 V 0.916; 102 G 0.964*; 1…	0.000452683	0.0245565
TRINITY_DN85763_c0_g1_i3	translation initiation factor IF-2, mitochondrial-like [Penaeus vannamei]	11 P 0.897; 28 Q 0.651; 34 L 0.866; 42 L 0.812; 80 Q 0.727; 96 S 0.903; 99 S 0.584; 128 V 0.746; 139 R 0.509; 140 P 0.929; 204 S 0.808; 276 F 0.869; 297 L 0.542; 303 E 0.846; 332 I 0.762; 333 T 0.779; 345 K 0.847; 356 C 0.934; 360 L 0.780; 365 H 0.965*; 371 S 0.919; 381 F 0.858; 399 M 0.762; 415 Q 0.909; 422 K 0.713; 431 Q 0.867; 435 L 0.859; 462 S 0.507; 467 V 0.696; 480 D 0.666; 501 D 0.679; 51…	0.000459477	0.0245565
TRINITY_DN76910_c0_g1_i1	PREDICTED: leucine-rich repeats and immunoglobulin-like domains protein 3 [Hyalella azteca]	22 R 0.518; 31 A 0.527; 81 S 0.630; 104 I 0.614; 106 Q 0.721; 109 A 0.518; 121 S 0.966*; 122 S 0.982*; 127 S 0.797; 131 N 0.505; 134 M 0.897; 141 S 0.989*; 168 T 0.567; 183 V 0.959*; 184 K 0.860; 186 F 0.923; 188 T 0.927; 192 I 0.529; 194 A 0.504; 200 R 0.821; 203 A 0.532; 211 Y 0.856; 230 T 0.788; 238 I 0.529; 239 S 0.983*; 242 S 0.952*; 250 E 0.956*; 254 I 0.972*; 256 S 0.913; 259 M 0.897; 274 …	0.000512007	0.0269891
TRINITY_DN58223_c0_g3_i1	CLUMA_CG011080, isoform A, partial [Clunio marinus]	NA	0.000533403	0.0274056
TRINITY_DN82126_c0_g1_i1	PREDICTED: methionine aminopeptidase 2-like [Hyalella azteca]	20 A 0.803; 21 P 0.826; 22 H 0.724; 27 A 0.806; 33 I 0.846; 35 K 0.621; 74 S 0.921; 76 S 0.920; 94 E 0.938; 121 K 0.943; 134 M 0.586; 142 S 0.935; 158 S 0.936; 224 S 0.679; 236 T 0.630; 237 T 0.746; 242 D 0.637	0.000534152	0.0274056
TRINITY_DN87312_c0_g1_i1	PREDICTED: putative serine/threonine-protein kinase haspin homolog [Aethina tumida]	4 L 0.981*; 10 A 0.717; 24 R 0.703; 63 G 0.990**; 65 S 0.689; 67 S 0.991**; 88 A 0.660; 89 Q 0.993**; 90 G 0.717; 94 V 0.863; 101 S 0.566; 102 L 0.555; 103 L 0.938; 104 T 0.924; 122 G 0.990*; 124 E 0.983*; 125 F 0.507; 162 S 0.893; 198 V 0.807; 204 K 0.620; 214 L 0.694; 215 A 0.877; 219 S 0.996**; 220 T 0.991**	0.000553062	0.0280024
TRINITY_DN87750_c0_g3_i2	PREDICTED: uncharacterized protein LOC108669482 [Hyalella azteca]	3 I 0.970*; 9 T 0.736; 47 W 0.937; 71 A 0.931; 72 V 0.956*; 74 H 0.523; 78 T 0.860; 85 E 0.966*; 89 R 0.633; 101 A 0.971*; 104 T 0.681; 108 S 0.958*; 110 V 0.891; 111 A 0.520; 120 T 0.901; 122 R 0.984*; 124 A 0.598; 127 Q 0.915; 131 T 0.862; 136 A 0.972*; 139 N 0.925; 142 H 0.877; 144 R 0.951*; 147 I 0.678; 148 D 0.771; 177 S 0.915; 179 T 0.958*; 185 R 0.860; 200 A 0.967*; 214 K 0.904; 225 A 0.97…	0.000602635	0.0298621
TRINITY_DN80433_c8_g1_i1	PREDICTED: uncharacterized protein LOC108673170 [Hyalella azteca]	5 P 0.971*; 6 L 0.837; 8 T 0.540; 10 R 0.727; 11 R 0.756; 12 I 0.580; 20 G 0.915; 24 K 0.952*; 25 T 0.616; 27 V 0.532; 28 A 0.947; 29 T 0.770; 31 L 0.622; 33 H 0.966*; 39 L 0.559; 42 L 0.965*; 49 G 0.956*; 52 G 0.623; 56 A 0.694; 57 C 0.977*; 62 E 0.512; 63 G 0.586; 64 L 0.946; 68 F 0.584; 70 I 0.582; 80 M 0.929; 84 G 0.686; 90 V 0.716; 97 L 0.678; 103 I 0.760; 105 S 0.683; 107 C 0.974*; 112 L 0.…	0.000605313	0.0298621
TRINITY_DN80424_c0_g1_i2	PREDICTED: uncharacterized protein LOC108677145 [Hyalella azteca]	3 G 0.647; 9 S 0.534; 10 A 0.924; 23 T 0.713; 26 H 0.525; 29 Q 0.730; 30 D 0.597; 35 A 0.888; 38 N 0.886; 40 T 0.869; 53 A 0.731; 58 R 0.647; 68 T 0.745; 87 V 0.882; 88 D 0.699; 95 M 0.621; 99 S 0.926; 101 H 0.753; 102 S 0.833; 111 S 0.787; 115 V 0.520; 116 D 0.664; 130 V 0.666; 143 L 0.635; 151 K 0.909; 169 I 0.526; 175 E 0.500; 176 S 0.820; 187 E 0.736; 197 I 0.848; 205 V 0.707; 212 S 0.572; 21…	0.000638156	0.0310839
TRINITY_DN76417_c0_g1_i1	PREDICTED: SPARC-related modular calcium-binding protein 2-like isoform X1 [Fopius arisanus]	1 V 0.626; 2 Y 0.624; 3 V 0.626; 4 P 0.660; 5 E 0.664; 6 C 0.656; 7 E 0.673; 8 T 0.669; 9 D 0.611; 10 G 0.622; 11 R 0.752; 12 F 0.629; 13 Q 0.765; 14 P 0.659; 15 L 0.799; 16 Q 0.632; 17 C 0.625; 18 H 0.614; 19 S 0.663; 20 F 0.894; 21 T 0.628; 22 G 0.622; 23 F 0.639; 24 C 0.625; 25 W 0.642; 26 C 0.625; 27 V 0.639; 28 S 0.662; 29 P 0.660; 30 E 0.626; 31 G 0.622; 32 L 0.759; 33 F 0.629; 34 V 0.689; …	0.000698245	0.0318378
TRINITY_DN80609_c0_g1_i1	PREDICTED: NADH dehydrogenase [ubiquinone] 1 alpha subcomplex subunit 9, mitochondrial-like [Hyalella azteca]	4 V 0.532; 6 V 0.862; 8 K 0.895; 10 L 0.861; 11 Q 0.568; 13 N 0.899; 14 S 0.938; 16 V 0.525; 17 S 0.892; 31 S 0.939; 54 T 0.824; 55 T 0.880; 92 L 0.527; 93 S 0.968*; 96 L 0.576; 115 K 0.947; 118 T 0.668; 140 T 0.526; 147 N 0.750; 159 A 0.909; 169 A 0.898; 186 P 0.908; 200 D 0.823; 216 W 0.804; 225 S 0.879; 226 Y 0.512; 231 T 0.953*; 235 I 0.725; 243 N 0.779; 247 V 0.857; 263 T 0.841; 266 M 0.537;…	0.000688663	0.0318378
TRINITY_DN82782_c6_g1_i1	PREDICTED: ribosome biogenesis protein NOC1-like [Hyalella azteca]	5 S 0.897; 6 K 0.875; 8 L 0.501; 17 A 0.822; 33 Q 0.647; 37 A 0.925; 41 D 0.818; 42 K 0.841; 54 P 0.536; 63 K 0.848; 71 V 0.691; 106 I 0.542; 122 N 0.551; 147 T 0.910; 154 K 0.874; 175 K 0.764; 186 M 0.815; 187 Q 0.559; 191 T 0.740; 206 K 0.531; 212 Q 0.530; 224 P 0.903; 231 Q 0.681; 252 H 0.534; 254 I 0.639; 258 T 0.950*; 263 T 0.556; 267 S 0.976*; 270 Q 0.538; 285 Q 0.843; 334 A 0.575; 342 K 0.…	0.00069115	0.0318378
TRINITY_DN81585_c6_g1_i1	PREDICTED: zinc finger protein 132-like [Hyalella azteca]	4 G 0.539; 10 T 0.540; 11 S 0.504; 12 P 0.501; 13 E 0.520; 15 M 0.514; 22 V 0.500; 30 M 0.503; 33 T 0.500; 34 T 0.502; 37 T 0.529; 42 T 0.502; 43 T 0.515; 46 T 0.510; 51 T 0.521; 57 D 0.506; 59 G 0.509; 62 D 0.524; 65 T 0.513; 67 G 0.519; 68 N 0.505; 69 F 0.532; 72 D 0.523; 78 R 0.502; 84 D 0.519; 96 A 0.530; 104 S 0.501; 105 S 0.509; 117 K 0.503; 120 Q 0.522; 126 V 0.518; 135 R 0.520; 140 D 0.51…	0.000703277	0.0318378
TRINITY_DN79880_c0_g1_i1	PREDICTED: aldehyde dehydrogenase family 16 member A1-like [Hyalella azteca]	12 S 0.955*; 30 C 0.916; 34 H 0.706; 41 G 0.787; 46 L 0.529; 53 A 0.707; 66 S 0.570; 91 T 0.927; 233 L 0.780; 328 D 0.749; 334 N 0.764; 360 L 0.803; 457 M 0.667; 521 S 0.834; 525 R 0.835; 529 G 0.572; 558 T 0.879; 613 T 0.802; 628 K 0.777; 629 Q 0.906; 655 S 0.787	0.00066596	0.0318378
TRINITY_DN86533_c1_g2_i1	PREDICTED: mucin-5AC-like [Hyalella azteca]	1 Y 0.841; 2 G 0.579; 3 R 0.695; 4 H 0.588; 5 L 0.615; 6 T 0.575; 7 K 0.809; 8 D 0.564; 9 H 0.574; 10 K 0.564; 11 P 0.606; 12 E 0.581; 13 S 0.710; 14 V 0.779; 15 K 0.646; 16 E 0.567; 17 K 0.564; 18 S 0.580; 19 R 0.589; 20 I 0.569; 21 T 0.750; 22 R 0.602; 23 C 0.598; 24 G 0.578; 25 G 0.595; 26 K 0.588; 27 V 0.578; 28 V 0.580; 29 N 0.561; 30 K 0.564; 31 S 0.609; 32 G 0.606; 33 V 0.579; 34 P 0.584; …	0.000682782	0.0318378
TRINITY_DN83209_c2_g2_i5	PREDICTED: uncharacterized protein LOC108672909 [Hyalella azteca]	3 I 0.811; 4 V 0.914; 9 A 0.578; 17 S 0.937; 24 T 0.954*; 59 Q 0.660; 60 S 0.912; 65 H 0.897; 77 T 0.975*; 82 V 0.955*; 87 H 0.900; 91 H 0.524; 102 G 0.671; 119 S 0.930; 126 H 0.576; 137 G 0.585; 151 K 0.866; 152 V 0.548; 155 A 0.651; 181 T 0.920; 196 P 0.785; 211 S 0.984*; 237 A 0.943; 238 S 0.717; 244 W 0.911; 246 S 0.865; 247 Y 0.914; 250 G 0.844; 260 D 0.673; 270 A 0.604; 272 C 0.560; 277 Y 0…	0.000751567	0.0336283
TRINITY_DN89130_c3_g1_i12	PREDICTED: basement membrane-specific heparan sulfate proteoglycan core protein-like [Hyalella azteca]	61 M 0.768; 187 E 0.718; 199 L 0.688; 230 I 0.561; 244 T 0.764; 270 S 0.664; 293 E 0.531; 302 S 0.516; 312 Q 0.567; 345 V 0.814; 365 R 0.542; 370 D 0.729; 374 Q 0.915; 426 L 0.900; 456 Y 0.734; 465 H 0.730; 476 V 0.630; 534 L 0.827; 549 E 0.865; 568 D 0.900; 605 Y 0.671; 630 N 0.626; 639 E 0.609; 693 Q 0.759; 715 T 0.661; 721 R 0.505; 767 S 0.866; 801 I 0.542; 817 T 0.551; 819 Q 0.764; 854 H 0.81…	0.000772782	0.0341801
TRINITY_DN79925_c0_g1_i4	PREDICTED: uncharacterized protein LOC108675784 isoform X1 [Hyalella azteca]	13 T 0.623; 14 T 0.558; 15 N 0.837; 17 S 0.561; 18 K 0.901; 19 M 0.582; 21 A 0.603; 23 A 0.506; 24 L 0.550; 25 L 0.591; 28 C 0.904; 30 S 0.936; 33 Q 0.924; 35 E 0.543; 36 E 0.652; 43 Y 0.501; 46 I 0.961*; 51 R 0.777; 54 S 0.960*; 55 D 0.896; 59 Q 0.883; 63 E 0.911; 64 V 0.736; 66 N 0.879; 68 L 0.931; 70 I 0.678; 78 V 0.915; 83 M 0.914; 85 M 0.661; 87 L 0.540; 91 Q 0.923; 92 F 0.860; 97 A 0.933; 1…	0.000830418	0.0359039
TRINITY_DN85691_c6_g6_i1	PREDICTED: uncharacterized protein LOC108670251 [Hyalella azteca]	32 S 0.807; 50 E 0.699; 101 S 0.731; 114 H 0.712; 126 H 0.602; 134 E 0.539; 149 G 0.759; 163 N 0.563; 164 S 0.799; 187 Q 0.771; 200 Q 0.509; 205 P 0.653; 265 Q 0.578; 285 R 0.867; 297 C 0.579; 320 D 0.638; 330 T 0.505; 346 P 0.513; 366 Q 0.605; 377 A 0.803; 385 S 0.814; 450 S 0.868; 465 M 0.526; 481 W 0.649; 494 C 0.684; 498 N 0.621; 509 A 0.570; 527 G 0.613; 541 S 0.627; 557 R 0.744; 558 P 0.508…	0.000829255	0.0359039
TRINITY_DN77074_c0_g1_i1	NA	4 N 0.698; 9 R 0.646; 11 C 0.860; 12 N 0.609; 15 S 0.855; 16 D 0.556; 23 L 0.766; 37 Q 0.563; 40 A 0.932; 52 L 0.830; 54 S 0.509; 64 G 0.541; 67 H 0.793; 69 R 0.574; 71 I 0.934; 76 V 0.908; 78 Q 0.682; 79 T 0.675; 82 S 0.700; 96 S 0.883; 101 V 0.591; 103 R 0.522; 105 I 0.747; 112 T 0.864; 116 A 0.879; 118 R 0.559; 119 T 0.902; 122 A 0.800; 141 Y 0.721; 142 V 0.822; 143 S 0.915; 146 Q 0.653; 151 A…	0.000870771	0.0372281
TRINITY_DN83107_c2_g1_i1	PREDICTED: uncharacterized protein LOC108680234 [Hyalella azteca]	1 N 0.789; 10 K 0.903; 11 S 0.935; 17 S 0.544; 21 K 0.951*; 22 K 0.951*; 23 K 0.898; 24 D 0.765; 26 S 0.682; 28 E 0.915; 31 S 0.808; 32 T 0.895; 35 V 0.897; 37 D 0.795; 39 S 0.923; 45 S 0.868; 46 S 0.947; 51 T 0.508; 52 S 0.519; 57 S 0.832; 61 S 0.750; 63 S 0.622; 64 S 0.753; 66 K 0.786; 68 A 0.539; 69 S 0.713; 70 Q 0.730; 75 S 0.850; 77 S 0.964*; 79 Q 0.529; 81 V 0.525; 84 S 0.535; 86 S 0.964*; …	0.0008816	0.0372281
TRINITY_DN87251_c0_g1_i8	PREDICTED: uncharacterized protein LOC108673375 [Hyalella azteca]	17 H 0.835; 24 L 0.851; 28 K 0.755; 29 E 0.606; 31 Q 0.593; 33 G 0.826; 46 S 0.950; 53 Q 0.533; 56 L 0.901; 115 K 0.858; 119 A 0.844; 132 E 0.934; 142 G 0.736; 148 H 0.840; 180 T 0.914; 187 G 0.794; 190 G 0.883; 199 G 0.902; 217 Y 0.831; 222 P 0.952*; 227 Q 0.842; 246 G 0.902; 270 A 0.599; 295 K 0.516; 301 R 0.927; 318 T 0.902; 339 P 0.941; 342 P 0.911; 365 S 0.947; 408 K 0.934; 413 P 0.933; 420 …	0.000890068	0.0372281
TRINITY_DN80929_c3_g5_i1	PREDICTED: cytoskeleton-associated protein 5-like [Hyalella azteca]	NA	0.00093097	0.0385201
TRINITY_DN59960_c0_g1_i2	Endonuclease III-like protein 1 [Penaeus vannamei]	3 N 0.519; 7 I 0.571; 8 S 0.527; 11 L 0.580; 35 N 0.541; 44 G 0.568; 45 S 0.521; 49 Q 0.552; 52 P 0.568; 59 Q 0.547; 73 E 0.550; 77 A 0.504; 84 T 0.576; 92 V 0.567; 99 R 0.662; 114 I 0.546; 115 L 0.508; 124 L 0.548; 153 T 0.565	0.000954146	0.0386669
TRINITY_DN74479_c0_g1_i1	PREDICTED: RNA exonuclease 4-like [Hyalella azteca]	4 T 0.546; 8 V 0.545; 11 D 0.948; 15 E 0.889; 18 S 0.569; 28 A 0.982*; 29 L 0.747; 32 P 0.506; 33 P 0.691; 36 Y 0.946; 37 S 0.954*; 38 G 0.976*; 39 K 0.937; 47 E 0.948; 48 N 0.881; 52 E 0.717; 56 L 0.679; 61 S 0.529; 65 R 0.732; 66 T 0.674; 68 Q 0.955*; 78 V 0.616; 86 D 0.925; 87 K 0.974*; 88 T 0.686; 89 A 0.826; 90 V 0.982*; 94 S 0.931; 95 S 0.861; 101 S 0.572; 102 Q 0.983*; 104 G 0.961*; 109 S …	0.000964664	0.0386669
TRINITY_DN83264_c7_g1_i1	PREDICTED: uncharacterized protein LOC108678271 [Hyalella azteca]	9 M 0.767; 16 A 0.857; 51 L 0.791; 52 T 0.506; 63 R 0.676; 70 G 0.775; 71 A 0.827; 82 T 0.512; 102 G 0.798; 131 C 0.788; 152 H 0.751; 154 T 0.822; 172 R 0.681; 182 S 0.727; 194 P 0.833; 195 L 0.803; 198 G 0.772; 200 A 0.889	0.000958698	0.0386669
TRINITY_DN81223_c6_g1_i1	PREDICTED: apolipoprotein(a)-like [Hyalella azteca]	2 Y 0.992**; 18 D 0.899; 19 P 0.600; 21 Y 0.912; 22 V 0.551; 23 S 0.514; 25 T 0.879; 29 H 0.898; 30 E 0.646; 38 W 0.958*; 41 T 0.686; 42 P 0.826; 49 S 0.989*; 50 T 0.560; 66 N 0.737; 68 S 0.893; 69 S 0.911; 71 G 0.890; 94 D 0.896; 131 M 0.941; 132 E 0.637; 153 T 0.504; 174 E 0.992**; 176 T 0.610; 180 T 0.553; 181 R 0.987*; 185 S 0.913; 193 S 0.725; 204 M 0.743; 212 N 0.949; 216 N 0.977*; 271 S 0.…	0.00101077	0.0400974
TRINITY_DN79371_c0_g1_i1	PREDICTED: DNA polymerase delta subunit 3-like isoform X1 [Hyalella azteca]	30 N 0.686; 32 K 0.636; 57 E 0.731; 67 N 0.813; 88 S 0.862; 89 S 0.786; 95 H 0.678; 96 S 0.824; 107 R 0.881; 115 G 0.780; 142 S 0.511; 145 L 0.840; 185 D 0.676; 187 N 0.680; 203 S 0.819; 209 L 0.837; 210 S 0.935; 231 P 0.909; 236 K 0.835; 250 L 0.503; 265 F 0.954*; 273 D 0.763; 275 R 0.529; 309 S 0.821; 315 C 0.820; 327 D 0.790; 328 S 0.909; 336 Q 0.827; 341 Q 0.831; 367 V 0.755; 385 A 0.847; 389…	0.00102454	0.0402287
TRINITY_DN87958_c0_g2_i1	PREDICTED: glycogen debranching enzyme-like isoform X2 [Hyalella azteca]	3 Q 0.534; 27 D 0.516; 52 Q 0.616; 61 K 0.598; 74 T 0.609; 97 S 0.621; 104 C 0.521; 135 L 0.506; 178 S 0.588; 182 D 0.503; 190 K 0.642; 208 Q 0.572; 241 L 0.509; 301 H 0.586; 345 C 0.609; 347 S 0.584; 379 Q 0.531; 394 V 0.543; 397 M 0.524; 401 V 0.599; 402 S 0.548; 422 S 0.548; 442 T 0.610; 456 C 0.521; 464 Y 0.574; 478 D 0.513; 488 I 0.511; 500 S 0.577; 501 K 0.550; 522 I 0.511; 524 H 0.628; 564…	0.00105172	0.0408791
TRINITY_DN85827_c0_g5_i1	PREDICTED: protein FAM114A2-like [Hyalella azteca]	8 S 0.584; 68 T 0.537; 72 W 0.669; 75 I 0.607; 80 T 0.942; 83 G 0.922; 87 I 0.815; 98 N 0.916; 139 S 0.825; 149 S 0.590; 151 P 0.541; 152 S 0.968*; 170 I 0.623; 174 S 0.967*; 186 S 0.622; 193 M 0.807; 216 G 0.803; 219 R 0.854; 243 H 0.823; 251 S 0.568; 259 S 0.671; 262 K 0.852; 267 Y 0.869; 294 E 0.833; 301 Q 0.611; 307 L 0.902; 326 S 0.594; 343 Q 0.923; 359 S 0.928; 363 S 0.623; 371 P 0.908; 376…	0.00109091	0.0412917
TRINITY_DN86286_c6_g1_i1	PREDICTED: inactive pancreatic lipase-related protein 1-like [Hyalella azteca]	4 Q 0.660; 5 Q 0.916; 9 A 0.906; 10 K 0.607; 12 V 0.958*; 15 S 0.565; 38 S 0.978*; 64 K 0.965*; 73 L 0.505; 79 T 0.914; 81 T 0.937; 83 V 0.895; 105 E 0.974*; 118 R 0.888; 140 G 0.910; 150 S 0.947; 156 A 0.929; 174 R 0.587; 185 Y 0.888; 186 N 0.921; 197 S 0.938; 200 L 0.692	0.00109453	0.0412917
TRINITY_DN88643_c2_g1_i1	PREDICTED: ran GTPase-activating protein 1-like [Hyalella azteca]	4 K 0.525; 8 S 0.515; 116 S 0.621; 122 S 0.504; 156 I 0.619; 158 A 0.534; 160 T 0.565; 168 V 0.512; 169 C 0.544; 180 K 0.584; 185 L 0.515; 193 V 0.530; 196 E 0.517; 231 S 0.550; 235 G 0.505; 236 S 0.529; 247 M 0.592; 276 C 0.625; 306 S 0.537; 330 I 0.513; 339 L 0.502; 357 E 0.506; 374 F 0.591; 386 V 0.505; 395 S 0.523; 396 C 0.506; 413 E 0.605; 422 Q 0.503; 435 K 0.566; 486 Y 0.501; 496 T 0.515; …	0.00107667	0.0412917
TRINITY_DN83041_c6_g1_i2	phosphatidylglycerophosphatase and protein-tyrosine phosphatase 1-like [Penaeus vannamei]	9 S 0.689; 19 V 0.617; 23 Y 0.984*; 29 Y 0.960*; 31 A 0.958*; 34 K 0.794; 37 I 0.750; 54 E 0.663; 69 K 0.943; 75 A 0.601; 80 D 0.706; 84 S 0.996**; 96 S 0.652; 98 S 0.997**; 103 R 0.533; 107 Q 0.903; 111 D 0.943; 114 D 0.941; 115 H 0.966*; 117 A 0.610; 121 T 0.963*; 124 G 0.977*; 125 T 0.826; 151 A 0.735; 152 T 0.641; 154 Q 0.971*; 161 Q 0.994**; 162 R 0.840; 163 Q 0.658; 172 A 0.957*; 178 A 0.98…	0.00115284	0.042249
TRINITY_DN82913_c6_g1_i1	PREDICTED: chromosome transmission fidelity protein 18 homolog [Hyalella azteca]	32 H 0.877; 34 I 0.502; 36 S 0.990*; 42 S 0.971*; 61 N 0.890; 82 K 0.725; 86 M 0.869; 88 G 0.969*; 91 S 0.984*; 93 I 0.671; 111 L 0.548; 119 C 0.948; 137 R 0.925; 161 S 0.536; 169 T 0.901; 183 T 0.969*; 184 V 0.657; 185 G 0.952*; 187 M 0.596; 224 R 0.790; 230 S 0.942; 232 R 0.953*; 235 F 0.732; 243 K 0.941; 244 P 0.980*; 248 V 0.604; 251 T 0.710; 258 S 0.583; 261 S 0.553; 263 S 0.834; 267 G 0.987…	0.00114301	0.042249
TRINITY_DN79025_c0_g1_i1	hypothetical protein C7M84_023873 [Penaeus vannamei]	2 T 0.559; 8 M 0.543; 13 A 0.523; 17 S 0.507; 21 V 0.515; 25 T 0.508; 35 M 0.503; 36 T 0.504; 46 C 0.512; 52 H 0.505; 61 K 0.551; 67 A 0.509; 70 G 0.577; 71 K 0.502; 72 S 0.557; 74 D 0.503; 92 L 0.528; 106 P 0.518; 108 T 0.514; 113 E 0.535; 120 Q 0.520; 123 A 0.523; 129 Y 0.531; 133 C 0.553; 140 H 0.504; 142 T 0.508; 154 V 0.550; 155 V 0.503; 156 A 0.502; 159 H 0.509; 163 Q 0.504; 164 K 0.513; 16…	0.00114128	0.042249
TRINITY_DN85634_c2_g1_i1	PREDICTED: presenilin-1-like [Hyalella azteca]	1 M 0.580; 2 D 0.603; 3 G 0.609; 4 H 0.607; 5 V 0.607; 6 E 0.604; 7 D 0.585; 8 H 0.607; 9 S 0.613; 10 N 0.675; 11 E 0.783; 12 D 0.604; 13 G 0.754; 14 I 0.605; 15 R 0.617; 16 K 0.736; 17 R 0.627; 18 S 0.734; 19 L 0.640; 20 E 0.619; 21 N 0.623; 22 K 0.622; 23 K 0.592; 24 Q 0.610; 25 N 0.588; 26 T 0.618; 27 D 0.620; 28 A 0.662; 29 G 0.667; 30 E 0.714; 31 P 0.615; 32 A 0.619; 33 V 0.693; 34 L 0.668; …	0.00121525	0.0441159
TRINITY_DN79268_c0_g1_i1	PREDICTED: 28S ribosomal protein S23, mitochondrial-like [Hyalella azteca]	21 K 0.830; 32 R 0.614; 65 L 0.799; 104 E 0.892; 107 R 0.843; 109 I 0.923; 110 S 0.814; 118 A 0.529; 129 G 0.711; 139 I 0.557; 154 S 0.945; 161 E 0.828; 163 E 0.828; 169 S 0.934; 170 R 0.781; 176 L 0.921; 183 S 0.776; 185 F 0.849	0.00124005	0.0444739
TRINITY_DN86150_c4_g1_i3	PREDICTED: kinetochore protein NDC80 homolog [Hyalella azteca]	2 N 0.879; 12 T 0.637; 17 L 0.585; 22 S 0.951*; 33 G 0.545; 38 G 0.892; 53 S 0.970*; 60 S 0.699; 61 D 0.544; 68 A 0.518; 87 S 0.523; 94 V 0.881; 95 A 0.576; 105 L 0.838; 110 T 0.963*; 117 A 0.939; 122 K 0.706; 123 R 0.565; 143 N 0.904; 144 M 0.879; 151 N 0.851; 154 Q 0.676; 155 Q 0.957*; 161 K 0.599; 162 T 0.816; 199 I 0.652; 208 T 0.919; 238 T 0.696; 244 E 0.784; 246 V 0.954*; 247 T 0.951*; 258 …	0.00124823	0.0444739
TRINITY_DN84950_c0_g1_i1	PREDICTED: uncharacterized protein LOC108680181 [Hyalella azteca]	7 L 0.940; 31 S 0.903; 44 P 0.550; 45 S 0.910; 46 M 0.787; 50 R 0.961*; 52 Q 0.961*; 83 R 0.506; 144 V 0.899; 173 L 0.943; 174 R 0.799; 198 Q 0.843; 279 I 0.836; 290 E 0.616; 291 F 0.883; 292 P 0.961*; 294 K 0.532; 324 C 0.919; 330 M 0.811; 334 C 0.812; 352 L 0.810; 397 Y 0.913; 404 L 0.550; 409 R 0.614; 412 S 0.947; 413 L 0.881; 414 S 0.527; 421 T 0.806; 439 L 0.973*; 443 T 0.918; 479 L 0.840; 4…	0.0013043	0.0460455
TRINITY_DN81155_c0_g1_i3	putative zinc finger FYVE domain-containing protein 1-like isoform X2 [Penaeus vannamei]	1 L 0.897; 9 V 0.753; 11 T 0.846; 16 Y 0.823; 37 Y 0.651; 41 V 0.793; 43 S 0.896; 46 G 0.790; 50 H 0.657; 53 S 0.796; 60 S 0.974*; 61 S 0.774; 72 L 0.798; 73 D 0.569; 75 F 0.733; 82 K 0.970*; 84 L 0.513; 91 L 0.632; 94 D 0.638; 98 A 0.943; 100 Y 0.760; 128 F 0.807; 141 S 0.957*; 149 S 0.967*; 154 A 0.689; 155 K 0.565; 157 K 0.891; 158 G 0.857; 164 A 0.882; 166 R 0.879; 176 K 0.959*; 178 R 0.892; …	0.0013563	0.0474459
TRINITY_DN82343_c3_g1_i6	PREDICTED: ELAV-like protein 1 isoform X3 [Hyalella azteca]	21 S 0.934	0.00142969	0.0495627
