# Supplementary material for: The Adaptive Evolution and Gigantism Mechanisms of the Hadal “Supergiant” Amphipod Alicella gigantea
Source: Frontiers journal article supplement (doi:10.3389/fmars.2021.743663), 2021-10-13
Supplement: Table_3.XLSX [file Table_3.XLSX]

## Sheet: Bs_merge_result.txt.fdr0.05.txt
Table S3. The PSGs list of the hadal amphipod B.schellenbergi.
Bs gene id	Bs gene description	sites	Pvalue	fdr
TRINITY_DN69237_c5_g1_i4	PREDICTED: uncharacterized protein LOC108671736 isoform X1 [Hyalella azteca]	NA	0	0
TRINITY_DN65172_c3_g5_i1	PREDICTED: uncharacterized protein LOC108680181 [Hyalella azteca]	7 C 0.941; 13 M 0.816; 17 C 0.855; 35 L 0.831; 80 Y 0.944; 87 L 0.630; 89 R 0.564; 92 R 0.625; 95 S 0.958*; 96 L 0.905; 97 S 0.596; 104 T 0.848; 122 L 0.970*; 126 T 0.926; 162 L 0.873; 167 I 0.780; 169 L 0.899; 173 G 0.909; 186 I 0.780; 187 S 0.514; 188 K 0.772; 189 H 0.988*; 194 S 0.760; 196 T 0.719; 197 S 0.938; 203 T 0.661; 212 L 0.514; 221 N 0.891; 228 K 0.501; 251 E 0.503; 287 L 0.502; 293 S…	4.2e-08	7.1934e-05
TRINITY_DN67123_c1_g1_i3	PREDICTED: uncharacterized protein LOC108675947 isoform X1 [Hyalella azteca]	NA	5.7e-08	7.1934e-05
TRINITY_DN69218_c0_g4_i2	NA	1 A 0.601; 2 N 0.551; 3 V 0.616; 4 T 0.648; 5 P 0.618; 6 D 0.562; 7 P 0.647; 8 E 0.577; 9 H 0.566; 10 T 0.629; 11 T 0.611; 12 P 0.634; 13 A 0.618; 14 K 0.619; 15 A 0.722; 16 A 0.625; 17 D 0.551; 18 L 0.653; 19 I 0.565; 20 N 0.597; 21 N 0.599; 22 A 0.601; 23 P 0.590; 24 S 0.571; 25 V 0.611; 26 H 0.615; 27 S 0.621; 28 A 0.590; 29 V 0.619; 30 S 0.582; 31 L 0.629; 32 P 0.611; 33 R 0.626; 34 S 0.633; …	1.57e-07	0.0001486
TRINITY_DN53857_c0_g1_i1	NA	1 L 0.684; 6 N 0.887; 8 E 0.509; 9 L 0.881; 26 S 0.978*; 27 S 0.546; 31 N 0.673; 35 Q 0.804; 38 A 0.567; 42 V 0.571; 43 S 0.805; 45 G 0.894; 47 V 0.637; 56 P 0.917; 67 K 0.932; 81 S 0.896; 85 L 0.939; 94 I 0.624; 96 K 0.918; 97 N 0.784; 113 K 0.963*; 117 E 0.916; 119 N 0.644; 121 N 0.926; 122 N 0.674; 124 P 0.962*; 126 S 0.956*; 127 F 0.647; 128 N 0.934; 129 K 0.608; 131 M 0.777; 135 S 0.949; 137…	2.47e-07	0.000187028
TRINITY_DN65627_c0_g2_i1	PREDICTED: microtubule-associated protein futsch-like isoform X2 [Hyalella azteca]	4 A 0.881; 19 S 0.504; 20 L 0.792; 33 G 0.744; 37 D 0.697; 38 E 0.790; 54 R 0.929; 60 N 0.776; 62 V 0.905; 66 R 0.764; 68 D 0.688; 69 S 0.923; 71 S 0.913; 90 I 0.672; 95 D 0.714; 97 S 0.679; 100 A 0.907; 102 A 0.816; 104 Y 0.840; 115 S 0.917; 117 D 0.557; 127 S 0.607; 129 S 0.961*; 161 N 0.692; 169 K 0.827; 186 L 0.608; 190 I 0.907; 196 A 0.792; 225 A 0.603; 411 K 0.680; 422 A 0.929; 424 S 0.815;…	7.92e-07	0.000499752
TRINITY_DN70677_c5_g1_i1	PREDICTED: uncharacterized protein LOC108673796 [Hyalella azteca]	5 S 0.880; 8 S 0.611; 24 E 0.622; 44 I 0.781; 47 P 0.936; 49 N 0.557; 51 E 0.803; 55 Q 0.653; 63 V 0.850; 67 E 0.873; 80 T 0.591; 88 S 0.628; 90 N 0.848; 98 E 0.937; 109 A 0.597; 110 M 0.644; 113 T 0.541; 125 K 0.614; 143 Y 0.580; 149 L 0.548; 154 Q 0.885; 163 K 0.612; 164 L 0.535; 167 P 0.775; 168 A 0.756; 173 Q 0.888; 188 N 0.576; 194 Q 0.708; 195 Y 0.570; 196 P 0.871; 203 A 0.541; 208 H 0.586;…	1.466e-06	0.000792897
TRINITY_DN68415_c3_g1_i3	PREDICTED: serine/threonine-protein kinase 26-like isoform X2 [Hyalella azteca]	NA	1.996e-06	0.000839651
TRINITY_DN71150_c3_g2_i2	protein NDUFAF4 homolog [Trichoplusia ni]	6 S 0.791; 30 L 0.517; 31 R 0.942; 45 N 0.651; 52 Q 0.707; 68 G 0.934; 71 T 0.794; 74 Q 0.541; 89 S 0.860; 91 P 0.606; 93 K 0.934; 94 S 0.650; 103 P 0.558; 105 P 0.895; 112 H 0.673; 125 A 0.856; 129 A 0.882; 135 A 0.945; 139 K 0.590; 144 Q 0.764; 145 H 0.803; 148 K 0.746; 149 A 0.925; 154 V 0.759; 155 V 0.916; 156 V 0.520; 165 C 0.660; 171 R 0.740; 172 N 0.862; 173 D 0.730; 174 D 0.647; 178 A 0.6…	1.949e-06	0.000839651
TRINITY_DN60417_c0_g1_i1	PREDICTED: inositol polyphosphate 1-phosphatase-like [Hyalella azteca]	5 A 0.792; 9 Y 0.521; 14 A 0.699; 17 S 0.563; 19 S 0.974*; 20 A 0.626; 25 T 0.890; 27 A 0.923; 29 L 0.878; 31 E 0.975*; 33 S 0.724; 34 D 0.852; 40 S 0.994**; 48 A 0.982*; 57 L 0.656; 62 L 0.579; 63 T 0.919; 65 P 0.945; 66 L 0.774; 75 V 0.602; 95 E 0.992**; 97 A 0.928; 98 A 0.993**; 99 C 0.796; 102 S 0.993**; 105 P 0.976*; 113 V 0.539; 116 V 0.970*; 120 A 0.835; 131 A 0.755; 133 S 0.954*; 134 S 0.…	4.167e-06	0.00157763
TRINITY_DN71634_c0_g1_i5	PREDICTED: uncharacterized protein LOC108668403 isoform X2 [Hyalella azteca]	2 A 0.901; 5 N 0.575; 9 T 0.892; 10 L 0.564; 12 Y 0.615; 16 S 0.926; 18 T 0.680; 22 P 0.973*; 28 N 0.826; 32 D 0.591; 36 D 0.937; 37 L 0.794; 38 P 0.982*; 41 V 0.659; 46 Q 0.951*; 55 H 0.534; 56 E 0.930; 61 S 0.986*; 63 A 0.959*; 81 S 0.984*; 98 S 0.958*; 109 E 0.566; 111 G 0.649; 124 T 0.964*; 126 E 0.716; 127 S 0.673; 133 K 0.950; 136 V 0.962*; 137 S 0.863; 140 V 0.574; 150 R 0.599; 159 L 0.777…	5.761e-06	0.0018176
TRINITY_DN70037_c3_g1_i1	PREDICTED: uncharacterized protein LOC108675684 [Hyalella azteca]	1 T 0.731; 2 K 0.652; 3 K 0.681; 4 K 0.682; 5 R 0.660; 6 G 0.652; 7 R 0.749; 8 A 0.767; 9 D 0.634; 10 S 0.678; 11 S 0.798; 12 T 0.863; 13 S 0.859; 14 V 0.664; 15 Q 0.786; 16 R 0.683; 17 G 0.713; 18 L 0.766; 19 R 0.769; 20 E 0.698; 21 L 0.870; 22 R 0.683; 23 S 0.659; 24 P 0.658; 25 L 0.796; 26 I 0.687; 27 V 0.664; 28 E 0.646; 29 V 0.774; 30 E 0.784; 31 R 0.694; 32 G 0.665; 33 A 0.784; 34 A 0.779; …	5.743e-06	0.0018176
TRINITY_DN66291_c3_g1_i4	PREDICTED: recQ-mediated genome instability protein 1-like [Hyalella azteca]	1 S 0.857; 2 Q 0.860; 6 A 0.516; 7 S 0.939; 8 T 0.660; 12 S 0.795; 15 R 0.653; 24 P 0.938; 26 T 0.947; 27 Q 0.770; 29 A 0.872; 38 A 0.614; 50 S 0.587; 52 L 0.504; 63 Q 0.651; 65 S 0.592; 66 N 0.732; 67 D 0.534; 68 V 0.581; 70 K 0.800; 71 N 0.890; 72 S 0.867; 74 N 0.726; 77 D 0.518; 82 N 0.548; 83 T 0.713; 84 R 0.837; 89 S 0.506; 90 D 0.532; 93 S 0.916; 94 V 0.827; 98 S 0.539; 99 S 0.687; 100 A 0.…	6.713e-06	0.00195503
TRINITY_DN65843_c3_g1_i1	PREDICTED: calcium-activated chloride channel regulator 4A-like [Hyalella azteca]	8 T 0.542; 22 L 0.675; 34 S 0.612; 44 Q 0.502; 48 E 0.814; 49 D 0.588; 56 P 0.535; 63 S 0.751; 78 Q 0.625; 124 S 0.834; 127 R 0.634; 147 D 0.658; 148 L 0.732; 153 P 0.780; 186 W 0.922; 190 D 0.712; 192 T 0.661; 198 T 0.884; 205 N 0.697; 207 R 0.566; 209 Q 0.758; 212 S 0.501; 213 K 0.662; 216 E 0.572; 219 R 0.854; 227 K 0.859; 246 E 0.697; 250 S 0.741; 272 D 0.660; 273 S 0.885; 274 L 0.618; 278 Q …	7.629e-06	0.0020631
TRINITY_DN63571_c0_g1_i1	PREDICTED: uncharacterized protein LOC108666458 [Hyalella azteca]	1 T 0.674; 2 I 0.511; 4 K 0.610; 5 Y 0.856; 7 K 0.565; 8 Y 0.761; 14 R 0.797; 15 K 0.760; 17 V 0.622; 19 T 0.517; 20 V 0.945; 22 C 0.897; 25 N 0.968*; 28 E 0.648; 30 L 0.895; 34 D 0.941; 38 R 0.739; 39 I 0.961*; 42 T 0.657; 44 N 0.565; 46 P 0.940; 50 P 0.507; 51 S 0.984*; 52 P 0.840; 54 E 0.557; 58 Q 0.899; 61 S 0.810; 64 A 0.618; 65 F 0.515; 66 K 0.948; 67 S 0.808; 72 T 0.671; 75 T 0.678; 77 S 0…	1.4324e-05	0.00361538
TRINITY_DN64223_c3_g1_i5	PREDICTED: nuclear RNA export factor 1-like [Hyalella azteca]	5 V 0.609; 23 Q 0.984*; 39 H 0.952*; 46 L 0.965*; 49 K 0.882; 50 Q 0.744; 77 S 0.965*; 94 L 0.714; 102 K 0.958*; 103 V 0.932; 104 Q 0.975*; 105 L 0.966*; 118 E 0.719; 134 L 0.593; 136 S 0.973*; 162 I 0.711; 164 T 0.988*; 181 V 0.977*; 183 G 0.969*; 199 L 0.684; 210 T 0.964*; 211 I 0.596; 213 E 0.984*; 215 S 0.651; 216 S 0.622; 219 H 0.739; 234 Q 0.577; 240 S 0.972*; 241 S 0.504; 246 L 0.987*; 252…	1.821e-05	0.00430894
TRINITY_DN69527_c3_g5_i1	uncharacterized protein Dmoj_GI15296, isoform C [Drosophila mojavensis] &gt;KRF93760.1 uncharacterized protein Dmoj_GI15296, isoform C [Drosophila mojavensis]	3 I 0.774; 6 A 0.818; 14 T 0.987*; 18 N 0.809; 20 G 0.576; 27 L 0.771; 29 G 0.875; 33 Y 0.871; 39 G 0.658; 40 Q 0.849; 43 A 0.988*; 51 V 0.587; 61 G 0.593; 69 Q 0.818; 72 L 0.545; 74 E 0.692; 82 S 0.961*; 84 F 0.951*; 87 P 0.691; 88 S 0.695; 89 R 0.987*; 90 V 0.972*; 99 T 0.665; 100 V 0.878; 101 D 0.570; 103 P 0.990**; 104 L 0.555; 105 Q 0.992**; 107 H 0.940; 112 W 0.596; 122 V 0.586; 138 R 0.900…	2.2206e-05	0.00476717
TRINITY_DN13684_c0_g1_i1	NA	22 R 0.625; 31 A 0.689; 81 S 0.615; 104 I 0.730; 106 Q 0.624; 109 A 0.509; 121 S 0.970*; 122 S 0.988*; 127 S 0.810; 129 V 0.575; 134 M 0.931; 141 S 0.992**; 166 A 0.568; 167 I 0.544; 168 T 0.711; 172 G 0.675; 183 V 0.973*; 184 K 0.943; 186 F 0.946; 188 T 0.963*; 192 I 0.653; 194 A 0.683; 200 R 0.938; 203 A 0.683; 206 T 0.578; 211 Y 0.897; 230 T 0.815; 238 I 0.653; 239 S 0.987*; 242 S 0.963*; 250 …	2.3924e-05	0.00476717
TRINITY_DN64369_c5_g1_i1	PREDICTED: uncharacterized protein LOC108673170 [Hyalella azteca]	5 P 0.960*; 6 L 0.771; 10 R 0.623; 11 R 0.597; 12 I 0.547; 20 G 0.879; 24 K 0.929; 25 T 0.535; 28 A 0.925; 29 T 0.758; 31 L 0.599; 33 H 0.949; 42 L 0.952*; 49 G 0.936; 52 G 0.605; 56 A 0.665; 57 C 0.966*; 63 G 0.502; 64 L 0.911; 68 F 0.534; 70 I 0.522; 80 M 0.906; 84 G 0.650; 90 V 0.691; 97 L 0.675; 103 I 0.709; 105 S 0.612; 107 C 0.954*; 114 V 0.510; 117 R 0.696; 126 K 0.914; 128 T 0.656; 132 V …	2.2723e-05	0.00476717
TRINITY_DN63570_c0_g1_i1	cuticle protein 8-like [Penaeus vannamei]	4 T 0.994**; 6 T 0.605; 7 Q 0.638; 13 P 0.758; 17 P 0.598; 18 T 0.664; 19 G 0.730; 27 P 0.985*; 28 A 0.990*; 37 S 0.966*; 58 Y 0.501; 63 R 0.865; 67 N 0.994**	2.6507e-05	0.00501778
TRINITY_DN69755_c5_g3_i3	PREDICTED: plastin-1-like [Hyalella azteca]	114 H 0.846; 296 S 0.919	3.2098e-05	0.00528361
TRINITY_DN58541_c0_g1_i1	NA	14 D 0.966*; 18 Y 0.960*; 24 S 0.990**; 29 N 0.875; 30 W 0.853; 34 R 0.546; 35 N 0.753; 43 G 0.714; 45 A 0.963*; 46 T 0.838; 50 M 0.601; 51 G 0.912; 53 R 0.827; 72 R 0.800; 73 E 0.638; 80 V 0.510; 81 E 0.948; 88 S 0.971*; 91 D 0.766; 93 S 0.761	3.0639e-05	0.00528361
TRINITY_DN67581_c3_g2_i2	PREDICTED: adenosine deaminase-like [Hyalella azteca]	10 K 0.579; 11 V 0.943; 52 K 0.883; 53 F 0.994**; 58 T 0.579; 68 K 0.601; 74 I 0.836; 82 D 0.694; 116 P 0.934; 117 S 0.739; 124 S 0.930; 129 S 0.985*; 132 S 0.975*; 133 T 0.888; 144 I 0.541; 148 A 0.835; 153 N 0.935; 168 S 0.969*; 174 W 0.954*; 199 T 0.630; 202 S 0.882; 217 R 0.882; 239 R 0.526; 255 S 0.930; 257 A 0.932; 258 K 0.891; 260 K 0.604; 263 N 0.687; 283 K 0.979*; 285 S 0.825; 292 L 0.63…	3.2003e-05	0.00528361
TRINITY_DN70529_c0_g2_i1	PREDICTED: uncharacterized protein LOC108667718 [Hyalella azteca]	1 K 0.593; 2 E 0.764; 3 K 0.583; 16 R 0.810; 27 L 0.951*; 29 S 0.954*; 31 E 0.618; 37 S 0.642; 39 H 0.608; 44 K 0.919; 45 D 0.748; 46 G 0.943; 52 D 0.903; 56 Q 0.549; 60 V 0.589; 64 Q 0.955*; 65 N 0.626; 67 M 0.823; 68 V 0.706; 75 D 0.609; 76 P 0.914; 80 P 0.913; 81 D 0.778; 84 N 0.814; 112 T 0.516; 118 C 0.972*; 124 G 0.828; 126 I 0.584; 127 K 0.716; 160 K 0.892; 165 G 0.940; 166 A 0.797; 173 K …	3.411e-05	0.00538085
TRINITY_DN65968_c2_g1_i4	PREDICTED: uncharacterized protein LOC108673809 [Hyalella azteca]	6 H 0.841; 10 V 0.816; 22 M 0.645; 127 A 0.875; 128 A 0.811; 154 S 0.851; 192 V 0.722; 197 K 0.837; 211 S 0.570; 234 S 0.894; 235 T 0.614; 239 D 0.751; 242 S 0.569; 244 K 0.854; 247 D 0.812; 249 T 0.579; 250 N 0.859; 273 N 0.787; 278 G 0.908; 284 K 0.567; 292 L 0.672; 300 G 0.835; 303 V 0.781; 308 P 0.879; 311 G 0.830; 312 A 0.890; 313 K 0.783; 316 S 0.877; 322 Q 0.917; 327 S 0.861; 332 I 0.538; …	3.86e-05	0.00575385
TRINITY_DN70299_c4_g2_i3	PREDICTED: uncharacterized AAA domain-containing protein C16E9.10c-like [Hyalella azteca]	1 M 0.613; 2 K 0.630; 3 D 0.619; 4 N 0.814; 5 R 0.762; 6 A 0.737; 7 P 0.673; 8 Y 0.667; 9 F 0.639; 10 L 0.668; 11 N 0.821; 12 N 0.822; 13 S 0.661; 14 L 0.664; 15 L 0.813; 16 D 0.723; 17 A 0.666; 18 V 0.666; 19 K 0.820; 20 E 0.705; 21 Y 0.647; 22 C 0.768; 23 E 0.625; 24 Q 0.686; 25 H 0.657; 26 V 0.820; 27 S 0.683; 28 V 0.711; 29 D 0.642; 30 L 0.660; 31 D 0.642; 32 F 0.728; 33 M 0.617; 34 T 0.636; …	3.9514e-05	0.00575385
TRINITY_DN1609_c0_g1_i1	PREDICTED: ferric-chelate reductase 1-like [Hyalella azteca]	90 F 0.539	4.2078e-05	0.00590027
TRINITY_DN66211_c1_g1_i1	NA	1 L 0.542; 2 G 0.578; 3 K 0.580; 4 P 0.541; 5 S 0.607; 6 L 0.543; 7 T 0.547; 8 L 0.542; 9 H 0.579; 10 T 0.602; 11 L 0.543; 12 R 0.565; 13 V 0.542; 14 K 0.535; 15 D 0.627; 16 G 0.542; 17 D 0.639; 18 R 0.539; 19 I 0.539; 20 M 0.533; 21 V 0.539; 22 L 0.542; 23 L 0.562; 24 R 0.640; 25 K 0.545; 26 N 0.540; 27 F 0.548; 28 G 0.580; 29 V 0.562; 30 S 0.552; 31 T 0.549; 32 A 0.550; 33 S 0.551; 34 A 0.582; …	4.6288e-05	0.0062588
TRINITY_DN63489_c6_g1_i1	PREDICTED: eukaryotic translation initiation factor 5B-like isoform X1 [Hyalella azteca]	7 L 0.811; 13 L 0.968*; 27 V 0.918; 30 S 0.922; 33 L 0.834; 42 K 0.675; 57 L 0.547; 121 R 0.848; 130 K 0.806; 147 K 0.813; 190 I 0.861; 196 T 0.813; 198 P 0.520; 200 T 0.936; 209 G 0.690; 210 E 0.899; 231 T 0.759; 238 S 0.965*; 241 G 0.870; 244 E 0.910; 254 E 0.931; 257 M 0.795; 279 S 0.607; 330 Y 0.799; 334 C 0.960*; 362 S 0.969*; 446 S 0.975*; 535 K 0.813; 732 K 0.807; 733 L 0.963*	5.6825e-05	0.0074186
TRINITY_DN63860_c0_g2_i1	39S ribosomal protein L44, mitochondrial-like [Penaeus vannamei]	3 L 0.593; 7 W 0.979*; 8 S 0.941; 9 K 0.837; 13 Q 0.760; 14 Q 0.596; 15 S 0.721; 25 S 0.562; 26 P 0.901; 29 N 0.529; 30 R 0.785; 32 T 0.901; 33 S 0.941; 40 A 0.907; 43 M 0.527; 46 R 0.925; 47 Q 0.776; 49 A 0.926; 51 D 0.924; 52 I 0.910; 94 T 0.756; 96 A 0.818; 100 K 0.959*; 109 H 0.527; 114 N 0.860; 116 T 0.552; 118 P 0.688; 120 E 0.933; 124 A 0.553; 129 R 0.609; 133 I 0.571; 136 T 0.828; 144 V 0…	6.3807e-05	0.00805244
TRINITY_DN71724_c0_g1_i4	PREDICTED: nucleolar protein 6-like [Hyalella azteca]	2 P 0.784; 17 D 0.905; 18 S 0.569; 19 D 0.917; 31 D 0.577; 36 R 0.934; 38 L 0.882; 40 H 0.659; 42 D 0.659; 45 S 0.626; 57 E 0.969*; 59 R 0.638; 64 R 0.531; 68 T 0.930; 72 L 0.667; 73 L 0.937; 79 I 0.674; 86 S 0.960*; 99 T 0.966*; 107 A 0.515; 115 C 0.975*; 117 T 0.956*; 121 T 0.510; 123 N 0.679; 126 Q 0.638; 133 N 0.884; 137 S 0.702; 145 N 0.942; 161 H 0.705; 162 N 0.923; 164 I 0.587; 172 Q 0.578…	7.199e-05	0.00851732
TRINITY_DN68979_c6_g1_i1	PREDICTED: ribosomal L1 domain-containing protein CG13096-like [Hyalella azteca]	4 K 0.531; 6 T 0.631; 7 T 0.971*; 12 S 0.980*; 16 I 0.653; 22 S 0.609; 30 C 0.935; 35 A 0.974*; 36 P 0.982*; 40 D 0.724; 52 G 0.710; 56 L 0.662; 65 V 0.601; 69 E 0.563; 82 R 0.947; 92 S 0.887; 94 H 0.948; 96 A 0.591; 107 K 0.967*; 111 A 0.517; 146 K 0.593; 148 T 0.585; 154 D 0.941; 163 S 0.888; 176 E 0.968*; 179 Q 0.785; 186 S 0.631; 189 L 0.791; 195 V 0.779; 203 V 0.505; 215 S 0.604; 217 P 0.979…	7.0801e-05	0.00851732
TRINITY_DN67288_c10_g1_i1	PREDICTED: FAD-dependent oxidoreductase domain-containing protein 1-like [Hyalella azteca]	3 S 0.718; 7 H 0.636; 14 R 0.623; 22 N 0.921; 36 Q 0.911; 37 S 0.970*; 47 A 0.748; 51 S 0.820; 54 L 0.511; 56 D 0.664; 66 Y 0.884; 70 T 0.726; 92 P 0.585; 93 D 0.518; 101 S 0.600; 105 K 0.844; 113 I 0.583; 117 T 0.551; 120 H 0.853; 125 D 0.854; 137 I 0.521; 151 T 0.954*; 152 G 0.899; 162 N 0.621; 165 H 0.849; 182 L 0.685; 211 V 0.878; 257 K 0.900; 260 W 0.872; 309 L 0.759; 317 V 0.789; 318 S 0.90…	8.3692e-05	0.00960175
TRINITY_DN70202_c6_g2_i1	PREDICTED: leucine-rich PPR motif-containing protein, mitochondrial-like [Hyalella azteca]	19 G 0.683; 23 S 0.824; 53 G 0.628; 55 P 0.687; 83 I 0.657; 91 L 0.722; 102 K 0.689; 112 N 0.636; 128 L 0.708; 160 A 0.556; 161 K 0.689; 166 Q 0.626; 223 K 0.792; 233 E 0.740; 235 A 0.645; 271 D 0.740; 277 A 0.749; 289 N 0.718; 292 A 0.744; 300 D 0.748; 301 A 0.633; 307 Y 0.610; 318 K 0.734; 324 Q 0.780; 333 K 0.515; 336 P 0.831; 341 T 0.571; 344 V 0.627; 349 C 0.578; 359 K 0.569; 375 Q 0.766; 37…	9.0828e-05	0.00982499
TRINITY_DN64840_c5_g1_i12	PREDICTED: leucine-rich repeat and death domain-containing protein 1-like isoform X1 [Hyalella azteca] &gt;XP_018011271.1 PREDICTED: leucine-rich repeat and death domain-containing protein 1-like isoform X1 [Hyalella azteca] &gt;XP_018011272.1 PREDICTED: leucine-rich repeat and death domain-containing protein 1-like isoform X1 [Hyalella azteca]	6 N 0.909; 10 M 0.952*; 13 S 0.968*; 15 H 0.961*; 18 A 0.985*; 19 M 0.939; 21 F 0.980*; 23 V 0.955*; 25 L 0.654; 28 S 0.954*; 35 A 0.771; 39 F 0.588; 40 I 0.773; 46 T 0.574; 48 T 0.504; 49 S 0.574; 56 Q 0.956*; 61 A 0.729; 63 H 0.932; 65 R 0.719; 68 D 0.860; 69 Q 0.594; 80 T 0.640; 87 T 0.771; 89 S 0.966*; 96 I 0.723; 97 N 0.935; 103 M 0.624; 104 H 0.958*; 105 G 0.866; 109 D 0.523; 111 K 0.980*; …	8.9437e-05	0.00982499
TRINITY_DN70315_c3_g1_i8	PREDICTED: DEAD-box ATP-dependent RNA helicase 20-like [Hyalella azteca]	5 Q 0.809; 14 L 0.625; 23 S 0.918; 26 I 0.671; 29 Q 0.833; 32 S 0.898; 34 V 0.930; 35 G 0.553; 38 G 0.832; 43 L 0.860; 52 S 0.564; 61 Q 0.850; 72 R 0.922; 85 D 0.885; 109 S 0.869; 121 K 0.809; 123 E 0.509; 133 R 0.619; 136 D 0.845; 142 K 0.816; 146 Q 0.611; 154 L 0.718; 156 E 0.902; 157 S 0.939; 167 L 0.504; 178 S 0.953*; 193 A 0.856; 218 I 0.755; 257 S 0.914; 258 K 0.862; 260 L 0.623; 262 R 0.86…	0.000108699	0.0110462
TRINITY_DN66595_c1_g1_i4	uncharacterized protein LOC113822986 [Penaeus vannamei]	11 P 0.791; 13 Q 0.914; 21 A 0.505; 29 N 0.957*; 45 T 0.855; 57 P 0.821; 60 V 0.643; 64 E 0.836; 84 D 0.941; 87 S 0.881; 98 S 0.836; 106 V 0.782; 125 H 0.515; 126 K 0.917; 129 S 0.502; 143 S 0.592; 168 E 0.908; 169 S 0.642; 172 K 0.915; 174 V 0.873; 186 S 0.913; 187 T 0.578; 188 G 0.578; 190 T 0.806; 195 A 0.536; 225 R 0.888; 319 L 0.553; 326 H 0.837; 360 A 0.833; 364 S 0.882; 390 K 0.792	0.000110726	0.0110462
TRINITY_DN62040_c0_g2_i1	PREDICTED: alkylated DNA repair protein alkB homolog 8-like isoform X1 [Hyalella azteca]	16 A 0.906; 17 A 0.841; 65 T 0.639; 67 S 0.777; 78 L 0.510; 101 E 0.862; 119 K 0.941; 120 D 0.682; 128 A 0.837; 138 H 0.743; 141 T 0.838; 171 S 0.827; 179 G 0.886; 181 A 0.820; 189 L 0.942; 206 S 0.959*; 208 K 0.885; 214 Q 0.706; 218 T 0.509; 221 S 0.565; 226 T 0.856; 235 L 0.552; 246 R 0.836; 271 F 0.734; 273 S 0.883; 293 S 0.949; 302 Q 0.865; 360 C 0.769; 374 K 0.790; 376 K 0.841; 390 N 0.740; …	0.00011087	0.0110462
TRINITY_DN67581_c3_g1_i3	PREDICTED: protein lines-like isoform X1 [Hyalella azteca]	4 M 0.557; 5 V 0.536; 8 S 0.697; 11 S 0.880; 16 H 0.590; 17 S 0.671; 21 S 0.990*; 23 C 0.978*; 32 S 0.968*; 33 P 0.730; 37 S 0.947; 38 A 0.613; 39 C 0.960*; 59 V 0.967*; 64 H 0.546; 65 T 0.540; 67 I 0.973*; 68 S 0.556; 69 S 0.958*; 72 L 0.903; 80 P 0.954*; 85 L 0.597; 87 P 0.680; 91 T 0.520; 92 L 0.833; 94 I 0.860; 96 E 0.579; 102 S 0.706; 105 V 0.967*; 118 A 0.808; 122 K 0.619; 128 S 0.711; 130 …	0.000120429	0.0116909
TRINITY_DN65844_c2_g2_i2	PREDICTED: uncharacterized protein LOC108678306 [Hyalella azteca]	2 K 0.923; 4 V 0.527; 5 V 0.915; 6 G 0.971*; 14 P 0.583; 16 I 0.743; 31 M 0.983*; 32 A 0.776; 40 S 0.977*; 43 A 0.560; 46 N 0.958*; 49 T 0.896; 52 R 0.606; 54 S 0.797; 55 Q 0.839; 60 S 0.703; 61 G 0.975*; 63 R 0.984*; 64 P 0.735; 65 R 0.885; 69 L 0.672; 71 Q 0.962*; 72 Q 0.788; 80 G 0.647; 81 I 0.718; 84 M 0.723; 100 V 0.934; 103 S 0.555; 119 C 0.983*; 129 G 0.537; 136 G 0.597; 151 I 0.945; 155 S…	0.000124535	0.0117872
TRINITY_DN59145_c0_g1_i1	PREDICTED: uncharacterized protein LOC108669517 isoform X1 [Hyalella azteca]	15 K 0.583; 31 Y 0.873; 34 A 0.516; 36 S 0.506; 39 E 0.817; 40 L 0.776; 49 P 0.759; 50 R 0.827; 73 Y 0.535; 80 L 0.902; 84 S 0.804; 87 T 0.667; 88 I 0.694; 121 K 0.632; 123 S 0.814; 128 Y 0.816; 133 S 0.890; 136 K 0.542; 142 S 0.862; 153 R 0.859; 160 N 0.800; 164 E 0.719; 167 S 0.501; 191 G 0.815; 193 V 0.577; 203 S 0.841; 214 E 0.860; 221 K 0.586; 234 Y 0.626; 238 C 0.623; 249 R 0.839; 258 E 0.6…	0.000134957	0.0124621
TRINITY_DN68956_c8_g1_i1	PREDICTED: carnitine O-palmitoyltransferase 2, mitochondrial-like [Hyalella azteca]	5 L 0.986*; 6 L 0.526; 8 G 0.775; 16 R 0.639; 22 L 0.613; 26 S 0.678; 46 N 0.946; 86 S 0.719; 98 T 0.562; 109 E 0.924; 152 V 0.718; 162 A 0.921; 174 H 0.972*; 199 Q 0.963*; 203 Q 0.889; 204 F 0.961*; 209 S 0.960*; 212 I 0.776; 235 L 0.786; 242 C 0.938; 244 K 0.939; 247 R 0.602; 265 G 0.816; 268 D 0.614; 279 I 0.622; 286 K 0.984*; 291 Q 0.693; 304 V 0.793; 310 Q 0.896; 322 A 0.907; 369 S 0.987*; 4…	0.000158328	0.0139402
TRINITY_DN60262_c0_g1_i1	PREDICTED: cyclin-Y-like [Hyalella azteca]	NA	0.000157191	0.0139402
TRINITY_DN64746_c0_g1_i1	zinc finger FYVE domain-containing protein 1 isoform X1 [Cephus cinctus] &gt;XP_024945791.1 zinc finger FYVE domain-containing protein 1 isoform X1 [Cephus cinctus]	1 L 0.902; 9 V 0.761; 11 T 0.847; 16 Y 0.826; 20 V 0.667; 25 P 0.598; 30 S 0.607; 32 S 0.822; 34 P 0.895; 35 E 0.930; 36 A 0.962*; 42 Y 0.656; 46 V 0.804; 48 S 0.902; 51 G 0.794; 55 H 0.671; 58 S 0.795; 65 S 0.976*; 66 S 0.783; 77 L 0.813; 78 D 0.555; 80 F 0.746; 87 K 0.973*; 89 L 0.530; 96 L 0.644; 99 D 0.634; 103 A 0.948; 105 Y 0.769; 133 F 0.811; 146 S 0.961*; 154 S 0.971*; 159 A 0.691; 160 K …	0.000164676	0.0141696
TRINITY_DN64377_c1_g3_i3	NA	2 D 0.500; 7 C 0.576; 12 Q 0.638; 15 S 0.743; 16 N 0.813; 20 S 0.919; 21 V 0.602; 22 T 0.942; 27 Y 0.570; 34 P 0.563; 43 V 0.510; 49 K 0.858; 55 S 0.952*; 58 H 0.524; 64 A 0.595; 66 T 0.969*; 68 A 0.580; 75 T 0.672; 86 T 0.538; 88 L 0.928; 90 K 0.632; 94 R 0.931; 105 V 0.772; 107 E 0.570; 108 A 0.785; 112 L 0.540; 116 S 0.945; 118 T 0.894; 141 V 0.731; 159 H 0.917; 167 F 0.727; 175 S 0.927; 177 Y…	0.00017961	0.0151112
TRINITY_DN68506_c0_g1_i1	probable ATP-dependent RNA helicase DDX27 [Aedes aegypti] &gt;EAT37719.1 AAEL010317-PA [Aedes aegypti]	6 G 0.900; 8 N 0.502; 12 A 0.925; 17 N 0.590; 22 I 0.535; 26 Q 0.890; 29 N 0.937; 32 V 0.935; 37 E 0.603; 45 L 0.516; 46 P 0.937; 52 A 0.970*; 64 F 0.818; 97 Q 0.591; 124 I 0.899; 130 Q 0.591; 145 M 0.918; 146 M 0.585; 147 T 0.626; 150 S 0.524; 155 E 0.527; 157 R 0.725; 163 A 0.959*; 166 G 0.719; 169 T 0.510; 175 A 0.561; 202 M 0.936; 211 C 0.989*; 215 P 0.666; 216 A 0.559; 241 S 0.980*; 243 V 0.…	0.000198858	0.0163669
TRINITY_DN65063_c5_g1_i1	NA	1 M 0.630; 2 T 0.814; 3 Y 0.770; 4 L 0.720; 5 V 0.761; 6 L 0.872; 7 T 0.791; 8 S 0.782; 9 C 0.792; 10 R 0.730; 11 L 0.730; 12 L 0.786; 13 S 0.830; 14 T 0.774; 15 E 0.853; 16 V 0.828; 17 G 0.722; 18 N 0.844; 19 I 0.709; 20 A 0.922; 21 T 0.699; 22 I 0.680; 23 E 0.685; 24 R 0.673; 25 Y 0.726; 26 N 0.819; 27 G 0.702; 28 E 0.652; 29 N 0.830; 30 F 0.715; 31 G 0.656; 32 P 0.725; 33 Y 0.665; 34 I 0.710; …	0.00022633	0.0182316
TRINITY_DN65907_c6_g3_i1	PREDICTED: spermine oxidase-like [Hyalella azteca]	22 Q 0.906; 24 E 0.915; 79 S 0.584; 94 Q 0.748; 121 Q 0.504; 129 R 0.782; 136 R 0.927; 176 L 0.895; 230 S 0.945; 240 P 0.930; 244 I 0.881; 247 P 0.943; 252 R 0.872; 259 Y 0.856; 327 H 0.916; 329 P 0.860; 399 S 0.878; 420 Q 0.835; 423 T 0.796; 425 V 0.507; 431 S 0.504; 432 S 0.902; 461 S 0.530; 467 Q 0.504; 488 T 0.868; 494 Q 0.859; 495 Q 0.933; 497 S 0.909; 499 Q 0.868; 500 Q 0.732; 501 A 0.800; …	0.000245255	0.0193445
TRINITY_DN69920_c5_g1_i6	PREDICTED: UBX domain-containing protein 4-like [Hyalella azteca]	1 M 0.682; 2 D 0.766; 3 W 0.709; 4 F 0.707; 5 S 0.702; 6 G 0.695; 7 S 0.808; 8 I 0.699; 9 P 0.706; 10 E 0.699; 11 A 0.702; 12 I 0.700; 13 G 0.785; 14 T 0.727; 15 S 0.711; 16 K 0.691; 17 S 0.768; 18 R 0.783; 19 N 0.772; 20 A 0.708; 21 L 0.758; 22 F 0.707; 23 V 0.690; 24 V 0.705; 25 F 0.707; 26 I 0.761; 27 S 0.711; 28 D 0.688; 29 S 0.700; 30 S 0.712; 31 A 0.790; 32 A 0.706; 33 S 0.700; 34 S 0.768; …	0.00026408	0.0203167
TRINITY_DN68285_c0_g1_i2	PREDICTED: ribosome biogenesis protein NOC1-like [Hyalella azteca]	5 S 0.894; 6 K 0.869; 17 A 0.811; 33 Q 0.633; 37 A 0.921; 41 D 0.817; 42 K 0.833; 63 K 0.842; 71 V 0.691; 106 I 0.523; 122 N 0.555; 147 T 0.909; 154 K 0.877; 175 K 0.754; 186 M 0.807; 187 Q 0.553; 191 T 0.748; 212 Q 0.526; 224 P 0.900; 231 Q 0.691; 254 I 0.626; 258 T 0.946; 262 R 0.526; 263 T 0.561; 267 S 0.972*; 270 Q 0.533; 285 Q 0.839; 334 A 0.567; 342 K 0.877; 347 Y 0.790; 411 E 0.822; 414 S …	0.000268313	0.0203167
TRINITY_DN63896_c0_g3_i1	PREDICTED: carbonic anhydrase-like, partial [Hyalella azteca]	3 H 0.743; 16 G 0.706; 43 H 0.656; 47 F 0.879; 50 D 0.841; 80 D 0.897; 94 N 0.786; 108 F 0.806; 141 L 0.757; 165 G 0.873; 221 G 0.798; 226 S 0.896	0.000282426	0.020966
TRINITY_DN67865_c0_g1_i1	PREDICTED: plasminogen-like [Hyalella azteca]	13 S 0.881; 19 N 0.931; 28 S 0.554; 30 S 0.981*; 34 N 0.898; 35 L 0.543; 37 G 0.884; 78 T 0.660; 94 E 0.968*; 159 E 0.900; 161 S 0.951*; 167 P 0.675; 192 A 0.910; 193 E 0.683; 194 F 0.866; 200 G 0.889; 231 S 0.531; 292 T 0.593; 323 R 0.514; 326 L 0.608	0.000314498	0.0217746
TRINITY_DN69118_c0_g1_i2	NA	12 R 0.948; 15 Q 0.834; 19 Q 0.960*; 20 R 0.923; 23 A 0.987*; 24 S 0.791; 25 T 0.681; 27 I 0.935; 31 M 0.777; 32 A 0.921; 35 P 0.949; 36 R 0.727; 40 V 0.810; 46 Q 0.571; 50 A 0.975*; 64 Q 0.605; 66 L 0.860; 67 I 0.874; 80 V 0.569; 84 H 0.610; 85 C 0.984*; 88 G 0.548; 95 T 0.577; 97 G 0.968*; 98 G 0.941; 104 L 0.935; 107 I 0.865; 108 I 0.610; 109 G 0.903; 112 A 0.921; 116 S 0.560; 124 R 0.909	0.000306179	0.0217746
TRINITY_DN66493_c1_g1_i5	PREDICTED: NADH-quinone oxidoreductase subunit B-like [Hyalella azteca]	4 L 0.785; 7 R 0.974*; 14 S 0.953*; 15 M 0.945; 17 M 0.819; 23 C 0.970*; 27 G 0.960*; 31 A 0.862; 33 S 0.984*; 34 K 0.975*; 36 P 0.966*; 37 P 0.971*; 48 S 0.820; 49 S 0.975*; 68 S 0.989*; 127 L 0.991**; 133 A 0.649; 140 S 0.994**	0.000316324	0.0217746
TRINITY_DN70270_c1_g1_i3	PREDICTED: ubiquitin-protein ligase E3C-like [Hyalella azteca]	7 L 0.953*; 10 G 0.907; 19 G 0.925; 27 M 0.879; 34 S 0.943; 37 V 0.801; 39 M 0.885; 41 H 0.872; 45 R 0.546; 50 F 0.569; 55 L 0.520; 83 D 0.896; 98 C 0.962*; 107 Q 0.507; 109 R 0.803; 127 S 0.528; 129 A 0.873; 153 T 0.937; 166 R 0.765; 167 H 0.930; 169 L 0.575; 173 Y 0.909; 195 I 0.695; 200 L 0.680; 205 Y 0.964*; 208 F 0.624; 210 E 0.947; 213 A 0.519; 217 S 0.526; 228 R 0.528; 241 C 0.561; 242 R 0…	0.000303964	0.0217746
TRINITY_DN65551_c0_g3_i1	NA	2 P 0.697; 6 G 0.645; 15 L 0.564; 19 S 0.723; 22 S 0.834; 23 A 0.701; 24 S 0.971*; 33 S 0.510; 37 S 0.987*; 38 R 0.974*; 39 F 0.972*; 47 V 0.664; 58 T 0.894; 64 S 0.970*; 65 K 0.967*; 67 K 0.964*; 71 D 0.520; 73 S 0.663; 74 N 0.817; 77 L 0.953*; 80 Y 0.976*; 84 P 0.656; 91 F 0.593; 106 V 0.559; 110 V 0.686; 133 H 0.952*; 155 S 0.973*; 167 I 0.718; 168 S 0.981*; 192 S 0.637; 208 T 0.563	0.000347924	0.0234145
TRINITY_DN64051_c1_g1_i1	PREDICTED: protein ABHD14B-like [Hyalella azteca]	12 L 0.733; 13 E 0.751; 14 N 0.536; 15 E 0.782; 20 I 0.513; 21 K 0.955*; 28 V 0.675; 30 E 0.963*; 31 T 0.761; 37 V 0.896; 41 T 0.622; 42 I 0.513; 48 S 0.611; 54 W 0.913; 69 R 0.977*; 75 S 0.972*; 98 S 0.855; 102 K 0.517; 104 T 0.976*; 107 D 0.961*; 109 L 0.509; 110 I 0.601; 111 T 0.578; 112 Q 0.553; 114 R 0.921; 117 P 0.805; 119 L 0.672; 141 V 0.924; 149 R 0.955*; 152 A 0.529; 153 A 0.533; 154 H …	0.000352516	0.0234145
TRINITY_DN63101_c0_g2_i1	WD repeat domain phosphoinositide-interacting protein 2-like isoform X3 [Penaeus vannamei]	21 D 0.731; 25 M 0.575; 43 L 0.826; 74 P 0.886; 83 S 0.910; 85 P 0.987*; 86 R 0.770; 96 E 0.958*; 104 D 0.658; 121 F 0.822; 129 N 0.975*; 130 N 0.629; 138 S 0.961*; 140 D 0.977*; 161 G 0.968*; 164 A 0.919; 167 P 0.798; 169 I 0.796	0.000377794	0.023448
TRINITY_DN69154_c2_g2_i1	PREDICTED: conserved oligomeric Golgi complex subunit 7-like isoform X1 [Hyalella azteca]	13 T 0.518; 15 K 0.869; 88 V 0.548; 89 K 0.827; 92 G 0.751; 93 N 0.991**; 94 T 0.503; 95 T 0.800; 96 G 0.938; 101 D 0.610; 114 M 0.737; 115 L 0.535; 117 S 0.565; 130 A 0.929; 147 A 0.530; 197 A 0.797; 208 L 0.980*; 220 L 0.680; 229 L 0.602; 235 Q 0.925; 236 D 0.951*; 237 G 0.960*; 248 T 0.956*; 251 T 0.872; 261 A 0.960*; 269 P 0.542; 282 T 0.986*; 293 S 0.990*; 294 N 0.988*; 296 C 0.965*; 318 R 0…	0.000377032	0.023448
TRINITY_DN69068_c14_g1_i1	NA	10 S 0.614; 15 R 0.790; 25 T 0.635; 35 Q 0.530; 43 P 0.786; 52 S 0.840; 53 D 0.806; 56 S 0.847; 58 A 0.813; 59 A 0.556; 62 Q 0.673; 80 S 0.631; 82 S 0.836; 85 G 0.779; 98 D 0.581; 104 Y 0.762; 107 K 0.517; 115 D 0.632; 132 I 0.828; 136 E 0.604; 163 S 0.948; 166 E 0.723; 168 I 0.781; 169 L 0.579; 170 S 0.878; 180 Y 0.667; 188 S 0.580; 198 P 0.612; 199 S 0.677; 202 S 0.508; 206 K 0.810; 212 V 0.585…	0.00037724	0.023448
TRINITY_DN70696_c2_g2_i1	PREDICTED: acylglycerol kinase, mitochondrial-like [Hyalella azteca]	1 K 0.720; 2 F 0.763; 3 F 0.851; 4 K 0.764; 5 I 0.825; 6 L 0.765; 7 K 0.817; 8 N 0.721; 9 N 0.821; 10 P 0.717; 11 K 0.713; 12 K 0.720; 13 S 0.799; 14 I 0.720; 15 F 0.749; 16 F 0.720; 17 S 0.811; 18 G 0.826; 19 F 0.805; 20 G 0.722; 21 V 0.807; 22 F 0.815; 23 A 0.814; 24 T 0.808; 25 N 0.819; 26 F 0.814; 27 G 0.739; 28 K 0.720; 29 N 0.838; 30 K 0.720; 31 Y 0.721; 32 Q 0.850; 33 E 0.710; 34 E 0.710; …	0.000365581	0.023448
TRINITY_DN65553_c2_g2_i2	PREDICTED: probable E3 ubiquitin-protein ligase makorin-1 [Hyalella azteca]	6 D 0.910; 7 V 0.516; 9 Q 0.783; 10 S 0.958*; 11 R 0.639; 39 S 0.959*; 40 N 0.956*; 46 M 0.932; 47 N 0.883; 54 S 0.980*; 66 S 0.979*; 73 P 0.958*; 77 Q 0.745; 78 H 0.901; 79 Q 0.923; 80 Q 0.970*; 81 Q 0.977*; 83 R 0.926; 85 P 0.551; 86 K 0.716; 95 K 0.915; 97 G 0.914; 101 S 0.520; 106 I 0.504; 110 S 0.958*; 114 S 0.951*; 119 G 0.927; 133 Q 0.519; 134 C 0.611; 138 D 0.538; 145 E 0.526; 146 L 0.929…	0.000394932	0.0241163
TRINITY_DN67998_c5_g1_i3	PREDICTED: putative tRNA pseudouridine synthase Pus10 [Hyalella azteca]	1 M 0.747; 2 K 0.850; 3 S 0.828; 4 V 0.771; 5 K 0.864; 6 F 0.847; 7 L 0.762; 8 Q 0.839; 9 E 0.827; 10 I 0.877; 11 G 0.753; 12 C 0.760; 13 C 0.760; 14 P 0.768; 15 R 0.759; 16 C 0.769; 17 V 0.752; 18 L 0.766; 19 V 0.752; 20 H 0.855; 21 C 0.770; 22 F 0.820; 23 V 0.765; 24 R 0.769; 25 N 0.823; 26 T 0.850; 27 D 0.848; 28 H 0.769; 29 Y 0.855; 30 I 0.753; 31 T 0.829; 32 H 0.805; 33 D 0.803; 34 A 0.825; …	0.000416612	0.0250364
TRINITY_DN69347_c1_g4_i2	PREDICTED: ran GTPase-activating protein 1-like [Hyalella azteca]	4 K 0.544; 8 S 0.532; 31 T 0.508; 116 S 0.645; 121 H 0.504; 122 S 0.521; 156 I 0.642; 158 A 0.552; 160 T 0.587; 168 V 0.529; 169 C 0.566; 180 K 0.604; 185 L 0.533; 193 V 0.548; 196 E 0.535; 222 V 0.510; 231 S 0.569; 232 R 0.503; 235 G 0.522; 236 S 0.548; 247 M 0.615; 261 G 0.503; 276 C 0.650; 306 S 0.558; 330 I 0.532; 339 L 0.518; 357 E 0.526; 371 V 0.510; 374 F 0.614; 386 V 0.522; 395 S 0.541; 3…	0.000461984	0.0255978
TRINITY_DN71267_c1_g1_i2	Alkylated DNA repair protein alkB-like protein 7 [Penaeus vannamei]	NA	0.000455189	0.0255978
TRINITY_DN65118_c4_g1_i1	PREDICTED: uncharacterized protein LOC108668077 [Hyalella azteca]	2 S 0.532; 3 S 0.620; 9 L 0.804; 17 T 0.722; 29 Y 0.911; 30 C 0.976*; 35 S 0.947; 43 R 0.523; 48 E 0.618; 50 R 0.565; 73 D 0.815; 75 N 0.840; 90 L 0.664; 92 V 0.835; 111 L 0.912; 118 Q 0.942; 124 S 0.575; 127 R 0.916; 128 A 0.951*; 137 S 0.514; 201 N 0.929; 258 D 0.918; 289 M 0.887; 290 T 0.630; 292 I 0.552; 304 A 0.941; 329 S 0.882; 332 D 0.868; 336 S 0.797; 338 G 0.889; 341 K 0.893; 350 S 0.905…	0.000458862	0.0255978
TRINITY_DN71895_c2_g1_i8	PREDICTED: basement membrane-specific heparan sulfate proteoglycan core protein-like [Hyalella azteca]	61 M 0.778; 187 E 0.721; 199 L 0.699; 230 I 0.567; 244 T 0.774; 270 S 0.665; 293 E 0.538; 302 S 0.521; 312 Q 0.568; 345 V 0.819; 365 R 0.546; 370 D 0.737; 374 Q 0.918; 426 L 0.905; 456 Y 0.741; 465 H 0.739; 476 V 0.639; 534 L 0.833; 549 E 0.870; 568 D 0.904; 605 Y 0.680; 615 L 0.505; 630 N 0.637; 639 E 0.619; 693 Q 0.765; 716 T 0.671; 722 R 0.508; 768 S 0.869; 802 I 0.550; 818 T 0.558; 820 Q 0.77…	0.000467833	0.0255978
TRINITY_DN69123_c3_g2_i1	RNA polymerase II subunit B1 CTD phosphatase Rpap2-like [Penaeus vannamei] &gt;XP_027224857.1 RNA polymerase II subunit B1 CTD phosphatase Rpap2-like [Penaeus vannamei]	2 Y 0.703; 5 A 0.569; 21 V 0.739; 29 S 0.964*; 32 T 0.583; 41 A 0.909; 48 K 0.855; 50 A 0.809; 55 S 0.608; 58 H 0.597; 59 L 0.952*; 63 T 0.837; 79 R 0.654; 94 S 0.730; 108 P 0.694; 111 V 0.813; 112 T 0.566; 117 R 0.703; 119 T 0.906; 120 Y 0.816; 122 I 0.557; 127 L 0.510; 131 A 0.644; 147 L 0.564; 149 Q 0.653; 151 R 0.504; 155 L 0.750; 162 G 0.909; 165 Q 0.737; 167 N 0.600; 169 T 0.654; 174 C 0.78…	0.00046369	0.0255978
TRINITY_DN62959_c2_g4_i1	transcription factor p65-like isoform X1 [Penaeus vannamei]	7 S 0.855; 48 N 0.727; 70 V 0.651; 76 V 0.789	0.000473283	0.0255978
TRINITY_DN64023_c1_g1_i1	PREDICTED: uncharacterized protein LOC108683073 [Hyalella azteca]	7 T 0.855; 14 H 0.763; 17 Q 0.862; 19 G 0.734; 23 V 0.901; 30 P 0.915; 31 M 0.565; 34 R 0.735; 39 S 0.921; 40 S 0.561; 41 T 0.524; 42 L 0.913; 43 K 0.917; 44 A 0.631; 45 L 0.848; 48 V 0.893; 49 L 0.711; 51 D 0.918; 52 S 0.891; 53 N 0.709; 55 T 0.619; 56 P 0.934; 58 D 0.532; 60 V 0.916; 61 K 0.928; 67 D 0.749; 68 H 0.936; 69 S 0.820; 71 V 0.836; 73 M 0.918; 76 T 0.681; 81 L 0.711; 88 N 0.804; 90 N…	0.000451885	0.0255978
TRINITY_DN67080_c2_g2_i5	PREDICTED: U3 small nucleolar RNA-associated protein 4 homolog [Hyalella azteca]	2 T 0.668; 4 N 0.892; 6 V 0.541; 7 V 0.558; 8 L 0.705; 12 Q 0.738; 14 M 0.970*; 17 R 0.930; 20 L 0.905; 24 L 0.792; 29 K 0.634; 30 S 0.716; 32 L 0.526; 48 L 0.887; 58 P 0.945; 62 A 0.948; 67 R 0.634; 84 H 0.693; 85 S 0.959*; 94 G 0.927; 96 H 0.923; 97 V 0.649; 99 V 0.633; 100 T 0.732; 103 A 0.645; 106 S 0.938; 111 A 0.722; 115 L 0.719; 120 T 0.821; 122 G 0.635; 128 L 0.967*; 137 N 0.973*; 138 D 0…	0.000502395	0.026776
TRINITY_DN69443_c0_g1_i2	translation initiation factor IF-2, mitochondrial-like [Penaeus vannamei]	11 P 0.897; 28 Q 0.651; 34 L 0.866; 42 L 0.812; 80 Q 0.727; 96 S 0.904; 99 S 0.585; 128 V 0.746; 139 R 0.510; 140 P 0.929; 204 S 0.809; 276 F 0.869; 297 L 0.543; 303 E 0.846; 332 I 0.763; 333 T 0.779; 345 K 0.847; 356 C 0.934; 360 L 0.780; 365 H 0.965*; 371 S 0.919; 381 F 0.858; 399 M 0.763; 415 Q 0.909; 422 K 0.714; 431 Q 0.867; 435 L 0.860; 462 S 0.508; 467 V 0.696; 480 D 0.666; 501 D 0.679; 51…	0.000509211	0.026776
TRINITY_DN69498_c0_g1_i6	NA	3 P 0.583; 6 C 0.988*; 8 T 0.923; 10 A 0.959*; 13 F 0.904; 14 S 0.654; 20 A 0.661; 21 V 0.901; 37 M 0.803; 38 A 0.520; 43 E 0.573; 48 T 0.522; 57 L 0.933; 65 Q 0.787; 67 T 0.817; 79 G 0.945; 83 T 0.732; 84 T 0.502; 86 G 0.907; 87 S 0.977*; 88 V 0.543; 90 R 0.951*; 93 T 0.905; 94 L 0.839; 97 D 0.685; 102 A 0.831; 103 V 0.600; 104 T 0.896; 105 A 0.675; 112 L 0.922; 113 K 0.543; 114 D 0.955*; 115 T …	0.000530446	0.0273284
TRINITY_DN66524_c0_g1_i1	PREDICTED: methionine aminopeptidase 2-like [Hyalella azteca]	20 A 0.803; 21 P 0.826; 22 H 0.724; 27 A 0.806; 33 I 0.846; 35 K 0.621; 74 S 0.921; 76 S 0.920; 94 E 0.938; 121 K 0.943; 134 M 0.586; 142 S 0.935; 158 S 0.936; 224 S 0.679; 236 T 0.630; 237 T 0.746; 242 D 0.637	0.000534152	0.0273284
TRINITY_DN67575_c0_g3_i2	PREDICTED: uncharacterized protein LOC108677145 [Hyalella azteca]	7 S 0.561; 8 A 0.930; 21 T 0.728; 23 E 0.500; 24 H 0.540; 27 Q 0.742; 28 D 0.616; 33 A 0.897; 36 N 0.896; 38 T 0.881; 51 A 0.738; 56 R 0.657; 66 T 0.754; 85 V 0.889; 86 D 0.717; 93 M 0.649; 97 S 0.936; 99 H 0.768; 100 S 0.845; 109 S 0.794; 113 V 0.538; 114 D 0.680; 128 V 0.678; 148 K 0.917; 166 I 0.535; 172 E 0.521; 173 S 0.834; 184 E 0.753; 194 I 0.861; 202 V 0.717; 209 S 0.596; 212 H 0.869; 214…	0.000558512	0.0278227
TRINITY_DN65871_c5_g6_i6	PREDICTED: putative serine/threonine-protein kinase haspin homolog [Aethina tumida]	4 L 0.981*; 10 A 0.716; 24 R 0.703; 63 G 0.990**; 65 S 0.690; 67 S 0.991**; 88 A 0.659; 89 Q 0.993**; 90 G 0.718; 94 V 0.863; 101 S 0.565; 102 L 0.554; 103 L 0.938; 104 T 0.924; 122 G 0.990*; 124 E 0.983*; 125 F 0.507; 162 S 0.893; 198 V 0.807; 204 K 0.620; 214 L 0.693; 215 A 0.877; 219 S 0.996**; 220 T 0.991**	0.000553062	0.0278227
TRINITY_DN65463_c6_g1_i2	PREDICTED: probable leucine--tRNA ligase, mitochondrial isoform X1 [Hyalella azteca] &gt;XP_018014850.1 PREDICTED: probable leucine--tRNA ligase, mitochondrial isoform X2 [Hyalella azteca]	5 E 0.933; 9 S 0.785; 10 K 0.704; 35 L 0.634; 45 L 0.744; 84 Q 0.954*; 90 T 0.950; 91 D 0.500; 106 S 0.979*; 119 M 0.810; 132 F 0.931; 151 Q 0.888; 163 R 0.891; 164 R 0.532; 180 M 0.586; 185 S 0.976*; 197 A 0.947; 205 L 0.973*; 221 E 0.912; 232 L 0.751; 259 V 0.703; 260 C 0.768; 271 P 0.963*; 291 S 0.894; 300 T 0.837; 331 N 0.781; 333 D 0.815; 345 E 0.943; 371 T 0.663; 372 A 0.913; 385 N 0.774; 4…	0.000565989	0.027829
TRINITY_DN15179_c0_g1_i1	NA	1 S 0.615; 2 N 0.620; 4 A 0.539; 5 S 0.525; 6 V 0.507; 7 S 0.565; 8 S 0.547; 9 P 0.606; 10 N 0.594; 12 I 0.557; 15 G 0.568; 19 N 0.606; 21 S 0.654; 22 L 0.614; 24 S 0.597; 26 G 0.559; 31 S 0.594; 34 D 0.591; 36 S 0.671; 39 G 0.605; 40 I 0.539; 41 P 0.572; 42 P 0.512; 46 S 0.552; 61 V 0.516	0.000576366	0.0279759
TRINITY_DN67235_c1_g5_i2	PREDICTED: uncharacterized protein LOC108680234 [Hyalella azteca]	1 N 0.786; 10 Q 0.932; 11 S 0.937; 17 S 0.516; 21 K 0.950*; 22 K 0.950*; 23 K 0.900; 24 D 0.749; 26 S 0.682; 28 E 0.909; 31 S 0.812; 32 T 0.889; 35 V 0.890; 37 D 0.787; 39 S 0.928; 45 S 0.869; 46 S 0.945; 57 S 0.840; 61 S 0.736; 64 L 0.852; 65 N 0.655; 67 S 0.983*; 68 T 0.566; 74 K 0.571; 75 P 0.944; 76 S 0.513; 77 P 0.932; 81 A 0.918; 85 T 0.553; 87 Q 0.587; 90 K 0.529; 93 S 0.940; 95 D 0.906; 9…	0.000598132	0.0280928
TRINITY_DN66819_c0_g1_i2	PREDICTED: NADH dehydrogenase [ubiquinone] 1 alpha subcomplex subunit 9, mitochondrial-like [Hyalella azteca]	4 V 0.533; 6 V 0.863; 8 K 0.896; 10 L 0.863; 11 Q 0.571; 13 N 0.900; 14 S 0.937; 16 V 0.527; 17 S 0.892; 31 S 0.940; 54 T 0.825; 55 T 0.881; 92 L 0.529; 93 S 0.968*; 96 L 0.580; 115 K 0.947; 118 T 0.671; 140 T 0.528; 147 N 0.752; 159 A 0.910; 169 A 0.899; 186 P 0.909; 200 D 0.823; 216 W 0.807; 225 S 0.879; 226 Y 0.515; 231 T 0.953*; 235 I 0.727; 243 N 0.780; 247 V 0.860; 263 T 0.843; 266 M 0.538;…	0.000601035	0.0280928
TRINITY_DN70902_c0_g1_i1	phosphatidylglycerophosphatase and protein-tyrosine phosphatase 1-like [Penaeus vannamei]	9 S 0.724; 19 V 0.651; 23 Y 0.987*; 27 S 0.511; 29 Y 0.966*; 31 A 0.965*; 34 K 0.810; 37 I 0.779; 54 E 0.697; 69 K 0.955*; 75 A 0.627; 80 D 0.737; 84 S 0.997**; 96 S 0.687; 98 S 0.998**; 103 R 0.561; 107 Q 0.914; 110 V 0.515; 111 D 0.952*; 114 D 0.950; 115 H 0.971*; 117 A 0.640; 121 T 0.970*; 124 G 0.981*; 125 T 0.845; 150 G 0.512; 151 A 0.759; 152 T 0.673; 154 Q 0.976*; 158 L 0.622; 161 Q 0.996*…	0.000588962	0.0280928
TRINITY_DN69162_c5_g1_i1	PREDICTED: uncharacterized protein LOC108671981 [Hyalella azteca]	9 K 0.934; 12 L 0.975*; 15 P 0.608; 16 A 0.642; 22 G 0.914; 24 D 0.962*; 27 S 0.887; 29 H 0.939; 38 A 0.691; 39 S 0.668; 48 P 0.979*; 52 E 0.606; 54 T 0.934; 55 P 0.968*; 56 E 0.970*; 57 A 0.697; 73 P 0.516; 76 Q 0.511; 80 A 0.580; 84 Q 0.572; 85 L 0.641; 94 H 0.944; 95 D 0.523; 99 V 0.601; 104 K 0.613; 108 H 0.742; 111 G 0.955*; 112 S 0.945; 113 C 0.637; 114 S 0.717; 117 T 0.816; 125 E 0.727; 12…	0.000647361	0.0298891
TRINITY_DN62168_c0_g1_i1	hypothetical protein BZG36_03832 [Bifiguratus adelaidae]	1 L 0.691; 2 K 0.991**; 3 C 0.834; 5 E 0.961*; 6 K 0.594; 8 V 0.980*; 13 V 0.564; 15 H 0.729; 16 D 0.693; 17 H 0.962*; 18 D 0.578; 20 S 0.674; 21 A 0.790; 22 A 0.560; 23 N 0.956*; 26 T 0.952*; 28 A 0.737; 30 V 0.949; 31 S 0.984*; 32 D 0.624; 36 R 0.989*; 42 T 0.805; 48 R 0.983*; 50 A 0.623; 51 L 0.940; 54 K 0.616; 56 R 0.623; 57 A 0.549; 58 E 0.894; 59 A 0.744; 62 Q 0.991**; 66 G 0.961*; 68 P 0.8…	0.000720415	0.0310605
TRINITY_DN71315_c0_g2_i1	PREDICTED: hyaluronan mediated motility receptor-like, partial [Hyalella azteca]	1 Q 0.773; 5 G 0.959*; 7 Q 0.913; 8 A 0.600; 11 A 0.704; 28 S 0.527; 45 K 0.912; 46 R 0.881; 48 M 0.902; 50 A 0.525; 51 H 0.802; 53 D 0.811; 57 A 0.927; 59 G 0.917; 60 A 0.711; 61 R 0.953*; 62 K 0.944; 64 A 0.569; 76 M 0.506; 77 T 0.849; 78 A 0.975*; 79 N 0.959*; 80 A 0.791; 83 L 0.981*; 86 Q 0.647; 87 V 0.532; 88 E 0.810; 90 F 0.528; 91 E 0.875; 96 R 0.850; 103 T 0.917; 104 M 0.740; 105 L 0.652;…	0.000709288	0.0310605
TRINITY_DN66469_c4_g1_i2	PREDICTED: zinc finger protein 132-like [Hyalella azteca]	4 G 0.539; 10 T 0.540; 11 S 0.504; 12 P 0.501; 13 E 0.520; 15 M 0.514; 22 V 0.500; 30 M 0.503; 33 T 0.500; 34 T 0.502; 37 T 0.529; 42 T 0.502; 43 T 0.515; 46 T 0.510; 51 T 0.521; 57 D 0.506; 59 G 0.509; 62 D 0.524; 65 T 0.513; 67 G 0.519; 68 N 0.505; 69 F 0.532; 72 D 0.523; 78 R 0.502; 84 D 0.519; 96 A 0.530; 104 S 0.501; 105 S 0.509; 117 K 0.503; 120 Q 0.522; 126 V 0.518; 135 R 0.520; 140 D 0.51…	0.000703277	0.0310605
TRINITY_DN66249_c9_g3_i2	PREDICTED: chromosome transmission fidelity protein 18 homolog [Hyalella azteca]	32 H 0.884; 34 I 0.511; 36 S 0.990**; 42 S 0.973*; 61 N 0.894; 82 K 0.736; 83 T 0.928; 86 M 0.877; 88 G 0.972*; 91 S 0.985*; 93 I 0.680; 111 L 0.557; 119 C 0.951*; 137 R 0.931; 161 S 0.546; 169 T 0.908; 183 T 0.971*; 184 V 0.671; 185 G 0.954*; 187 M 0.607; 224 R 0.800; 230 S 0.946; 232 R 0.956*; 235 F 0.743; 243 K 0.944; 244 P 0.982*; 248 V 0.614; 251 T 0.719; 258 S 0.594; 261 S 0.566; 263 S 0.84…	0.000705627	0.0310605
TRINITY_DN60989_c0_g1_i1	PREDICTED: proteasome subunit beta type-1-like [Hyalella azteca]	NA	0.000721955	0.0310605
TRINITY_DN69710_c10_g1_i1	PREDICTED: uncharacterized protein LOC108677184 [Hyalella azteca]	3 Q 0.905; 4 Q 0.977*; 5 Q 0.937; 6 Q 0.882; 7 Q 0.978*; 12 Y 0.722; 14 Q 0.972*; 15 T 0.800; 18 D 0.810; 20 A 0.951*; 21 Q 0.804; 22 P 0.525; 23 T 0.634; 24 R 0.749; 29 Q 0.664; 31 R 0.667; 39 P 0.788; 43 G 0.957*; 45 S 0.592; 47 G 0.955*; 50 R 0.937; 58 A 0.542; 60 S 0.614; 64 A 0.782; 65 G 0.627; 67 R 0.683; 69 F 0.688; 70 G 0.543; 72 S 0.521; 73 V 0.724; 74 A 0.859; 84 A 0.686; 99 S 0.971*; 1…	0.000707202	0.0310605
TRINITY_DN66037_c0_g1_i3	PREDICTED: mucin-5AC-like [Hyalella azteca]	1 Y 0.854; 2 G 0.627; 3 R 0.730; 4 H 0.636; 5 L 0.660; 6 T 0.624; 7 K 0.832; 8 D 0.613; 9 H 0.623; 10 K 0.613; 11 P 0.652; 12 E 0.628; 13 S 0.744; 14 V 0.803; 15 K 0.688; 16 E 0.616; 17 K 0.613; 18 S 0.628; 19 R 0.636; 20 I 0.618; 21 T 0.776; 22 R 0.648; 23 C 0.645; 24 G 0.627; 25 G 0.642; 26 K 0.635; 27 V 0.627; 28 V 0.628; 29 N 0.610; 30 K 0.613; 31 S 0.655; 32 G 0.651; 33 V 0.627; 34 P 0.632; …	0.000750097	0.0319086
TRINITY_DN64819_c0_g1_i3	PREDICTED: uncharacterized protein LOC108682775 [Hyalella azteca]	40 T 0.839; 46 S 0.946; 47 D 0.799; 48 T 0.832; 90 R 0.850; 125 Q 0.754; 169 T 0.799; 171 P 0.940; 173 T 0.646; 207 I 0.949; 208 S 0.968*; 242 H 0.525; 253 K 0.839; 266 S 0.937; 286 A 0.800; 287 K 0.892; 289 V 0.945; 299 L 0.971*; 304 A 0.856; 317 T 0.861; 340 I 0.855; 342 T 0.906; 346 P 0.583; 366 S 0.882; 382 A 0.834; 396 F 0.784; 430 W 0.883; 486 G 0.919; 520 I 0.909; 529 T 0.759; 532 E 0.912;…	0.000763565	0.0321206
TRINITY_DN64652_c2_g1_i1	PREDICTED: beta-1,4-galactosyltransferase 1-like [Hyalella azteca]	3 P 0.953*; 4 R 0.890; 6 V 0.878; 9 D 0.904; 11 P 0.934; 38 S 0.925; 41 Y 0.761; 48 S 0.943; 49 K 0.912; 55 T 0.917; 59 T 0.542; 62 R 0.545; 73 T 0.584; 79 E 0.689; 91 Q 0.937; 94 K 0.781; 95 L 0.900; 98 T 0.709; 105 F 0.899; 108 T 0.545; 109 F 0.961*; 110 R 0.511; 139 A 0.547; 157 V 0.614; 161 I 0.564; 170 A 0.924; 185 S 0.640; 186 Q 0.862; 187 L 0.548; 189 L 0.562; 193 V 0.774; 209 S 0.976*; 24…	0.000796632	0.0331434
TRINITY_DN39370_c0_g1_i1	Endonuclease III-like protein 1 [Penaeus vannamei]	7 I 0.520; 11 L 0.532; 44 G 0.517; 49 Q 0.502; 52 P 0.519; 73 E 0.500; 84 T 0.525; 92 V 0.517; 99 R 0.614; 153 T 0.517	0.000900463	0.037056
TRINITY_DN63888_c0_g1_i1	PREDICTED: RNA exonuclease 4-like [Hyalella azteca]	4 T 0.546; 8 V 0.545; 11 D 0.948; 15 E 0.889; 18 S 0.569; 28 A 0.982*; 29 L 0.747; 32 P 0.506; 33 P 0.691; 36 Y 0.946; 37 S 0.954*; 38 G 0.976*; 39 K 0.937; 47 E 0.948; 48 N 0.881; 52 E 0.717; 56 L 0.679; 61 S 0.529; 65 R 0.732; 66 T 0.674; 68 Q 0.955*; 78 V 0.616; 86 D 0.925; 87 K 0.974*; 88 T 0.686; 89 A 0.826; 90 V 0.982*; 94 S 0.931; 95 S 0.861; 101 S 0.572; 102 Q 0.983*; 104 G 0.961*; 109 S …	0.000964664	0.0392712
TRINITY_DN70745_c0_g1_i4	PREDICTED: uncharacterized protein LOC108674721, partial [Hyalella azteca]	7 A 0.796; 10 V 0.626; 14 S 0.654; 17 L 0.697; 18 N 0.537; 19 P 0.590; 38 V 0.568; 43 L 0.552; 45 P 0.654; 57 K 0.820; 59 P 0.806; 61 S 0.549; 67 T 0.840; 69 F 0.669; 70 P 0.805; 76 L 0.728; 90 I 0.570; 99 T 0.874; 109 L 0.690; 132 N 0.721; 137 T 0.628; 138 S 0.742; 143 T 0.741; 147 G 0.873; 155 L 0.546; 156 R 0.716; 160 R 0.706; 182 S 0.778; 189 L 0.853; 209 S 0.892; 213 T 0.612; 216 S 0.843; 22…	0.00101368	0.0403979
TRINITY_DN62148_c0_g1_i1	PREDICTED: pancreatic lipase-related protein 2-like [Hyalella azteca] &gt;XP_018026136.1 PREDICTED: pancreatic lipase-related protein 2-like [Hyalella azteca]	18 G 0.934; 42 A 0.968*; 49 S 0.884; 94 G 0.598; 102 T 0.949; 123 M 0.584; 129 E 0.687; 153 Y 0.936; 155 Q 0.985*; 157 R 0.967*; 161 Q 0.933; 162 L 0.948; 172 P 0.647; 176 V 0.893; 193 A 0.632; 209 P 0.929; 213 L 0.869; 234 R 0.689; 236 A 0.522; 241 S 0.987*; 256 T 0.598; 258 H 0.924; 260 S 0.915; 281 L 0.763; 296 A 0.957*; 299 I 0.527; 317 T 0.988*	0.00101006	0.0403979
TRINITY_DN66890_c0_g1_i4	PREDICTED: presenilin-1-like [Hyalella azteca]	1 M 0.594; 2 D 0.615; 3 G 0.620; 4 H 0.618; 5 V 0.619; 6 E 0.616; 7 D 0.598; 8 H 0.618; 9 S 0.624; 10 N 0.680; 11 E 0.785; 12 D 0.616; 13 G 0.758; 14 I 0.617; 15 R 0.628; 16 K 0.740; 17 R 0.635; 18 S 0.735; 19 L 0.649; 20 E 0.630; 21 N 0.634; 22 K 0.632; 23 K 0.606; 24 Q 0.622; 25 N 0.601; 26 T 0.629; 27 D 0.630; 28 A 0.669; 29 G 0.675; 30 E 0.716; 31 P 0.626; 32 A 0.629; 33 V 0.699; 34 L 0.674; …	0.00103662	0.0408819
TRINITY_DN66858_c7_g1_i1	PREDICTED: uncharacterized protein LOC108672909 [Hyalella azteca]	3 I 0.810; 4 V 0.913; 9 A 0.576; 17 S 0.937; 24 T 0.953*; 59 Q 0.658; 60 S 0.912; 65 H 0.896; 77 T 0.975*; 82 V 0.955*; 87 H 0.899; 91 H 0.522; 102 G 0.668; 119 S 0.930; 126 H 0.575; 137 G 0.583; 151 K 0.864; 152 V 0.546; 155 A 0.649; 181 T 0.920; 196 P 0.784; 211 S 0.984*; 237 A 0.943; 238 S 0.717; 244 W 0.911; 246 S 0.864; 247 Y 0.913; 250 G 0.843; 260 D 0.671; 270 A 0.603; 272 C 0.559; 277 Y 0…	0.00112048	0.0437334
TRINITY_DN67842_c1_g1_i1	PREDICTED: tetratricopeptide repeat protein 27-like [Hyalella azteca]	NA	0.00114863	0.0443746
TRINITY_DN65849_c5_g1_i3	PREDICTED: kinetochore protein NDC80 homolog [Hyalella azteca]	2 N 0.880; 12 T 0.638; 17 L 0.586; 22 S 0.951*; 33 G 0.547; 38 G 0.892; 53 S 0.971*; 60 S 0.700; 61 D 0.543; 68 A 0.520; 86 S 0.525; 93 V 0.881; 94 A 0.576; 104 L 0.839; 109 T 0.963*; 116 A 0.940; 121 K 0.707; 122 R 0.568; 142 N 0.905; 143 M 0.880; 150 N 0.851; 153 Q 0.676; 154 Q 0.958*; 160 K 0.601; 161 T 0.817; 198 I 0.653; 207 T 0.919; 237 T 0.697; 243 E 0.784; 245 V 0.954*; 246 T 0.951*; 257 …	0.00116641	0.0446062
TRINITY_DN51437_c0_g1_i1	aldose reductase-like [Cryptotermes secundus] &gt;PNF29295.1 Aldo-keto reductase family 1 member B10 [Cryptotermes secundus]	68 V 0.836; 106 I 0.581; 115 F 0.883; 120 G 0.944; 141 S 0.980*; 157 S 0.870; 161 S 0.912; 168 L 0.635; 178 P 0.953*; 181 V 0.873; 198 W 0.939; 206 L 0.600; 222 P 0.982*; 226 K 0.821; 231 E 0.951*; 235 K 0.965*; 267 S 0.700	0.00121882	0.0461446
TRINITY_DN64109_c0_g1_i1	PREDICTED: G kinase-anchoring protein 1-like [Hyalella azteca]	13 I 0.883; 14 N 0.742; 23 Q 0.597; 28 I 0.706; 45 T 0.513; 46 K 0.839; 53 L 0.697; 59 A 0.933; 61 S 0.974*; 69 S 0.968*; 70 P 0.504; 76 S 0.958*; 122 K 0.765; 123 D 0.882; 125 A 0.845; 165 S 0.973*; 188 T 0.632; 196 N 0.810; 205 G 0.941; 206 S 0.934; 207 G 0.522; 209 S 0.954*; 211 S 0.933; 217 S 0.932; 244 L 0.552; 254 S 0.985*; 267 S 0.949; 279 S 0.791; 291 S 0.509; 310 N 0.725	0.00124465	0.0466557
TRINITY_DN70344_c0_g1_i7	PREDICTED: PERQ amino acid-rich with GYF domain-containing protein 2-like isoform X1 [Hyalella azteca]	8 S 0.601; 12 N 0.921; 13 N 0.967*; 15 N 0.668; 17 N 0.964*; 18 G 0.975*; 19 G 0.657; 23 R 0.944; 24 G 0.796; 25 L 0.508; 33 P 0.965*; 36 N 0.974*; 53 L 0.620; 54 S 0.783; 73 T 0.972*; 74 S 0.601; 77 T 0.695; 78 M 0.620; 80 T 0.952*; 84 A 0.552; 91 G 0.541; 92 A 0.682; 93 G 0.973*; 95 T 0.643; 96 T 0.703; 98 N 0.920; 100 N 0.963*; 102 T 0.536; 104 A 0.531; 105 L 0.663; 106 E 0.970*; 108 E 0.902; …	0.00126058	0.0467897
TRINITY_DN67816_c2_g4_i1	PREDICTED: ubiquitin-like [Hyalella azteca]	NA	0.00133863	0.0492043
