# Supplementary material for: The Adaptive Evolution and Gigantism Mechanisms of the Hadal “Supergiant” Amphipod Alicella gigantea
Source: Frontiers journal article supplement (doi:10.3389/fmars.2021.743663), 2021-10-13
Supplement: Table_5.XLSX [file Table_5.XLSX]

## Sheet: merge_result.txt.fdr.txt_ano
TableS5.PSGs solely identified in A.gigantea
Ag gene id	Ag gene description	sites	Pvalue	fdr
TRINITY_DN84204_c2_g1_i16	PREDICTED: atypical protein kinase C-like isoform X3 [Hyalella azteca]	311 Q 1.000**; 314 V 0.999**; 316 P 0.998**; 318 H 0.750; 319 R 0.997**; 321 R 0.989*; 323 E 0.743; 324 G 1.000**; 325 E 0.609; 328 L 0.962*; 329 A 0.749	0	0
TRINITY_DN84381_c0_g1_i5	PREDICTED: nodal modulator 3-like [Hyalella azteca]	705 V 0.926; 706 R 0.898; 707 V 0.999**	0	0
TRINITY_DN81882_c2_g2_i1	inositol-trisphosphate 3-kinase homolog [Penaeus vannamei]	2 A 0.983*; 4 N 0.996**; 5 G 1.000**; 6 D 1.000**; 7 D 1.000**; 8 Y 0.979*	0	0
TRINITY_DN81836_c2_g2_i1	PREDICTED: inosine-5&apos;-monophosphate dehydrogenase 1-like isoform X1 [Hyalella azteca]	483 R 0.868; 484 S 0.991**; 487 Y 0.999**; 488 S 0.844; 492 K 0.858; 496 R 0.840; 499 S 0.874; 500 S 0.793; 505 E 0.936; 506 V 0.999**; 510 H 0.875; 512 Y 0.710	0	0
TRINITY_DN85741_c6_g3_i2	LOW QUALITY PROTEIN: N-acetylgalactosaminyltransferase 7-like [Penaeus vannamei]	460 T 0.988*; 461 S 0.962*; 464 G 1.000**; 465 D 0.994**; 466 F 1.000**; 468 W 1.000**; 471 T 1.000**; 473 N 0.963*; 474 D 0.999**; 477 T 0.996**	0	0
TRINITY_DN80865_c1_g2_i3	PREDICTED: alpha-actinin, sarcomeric-like isoform X2 [Hyalella azteca]	6 S 0.816; 7 Y 0.791; 10 T 0.714; 12 S 0.950*; 14 L 0.877; 16 K 0.771	1e-09	5.7e-07
TRINITY_DN81006_c8_g1_i7	putative protein no-on-transient A-like isoform X2 [Penaeus vannamei]	328 K 0.999**; 329 E 0.852; 330 R 0.993**; 332 M 0.996**	2.24e-07	0.000109344
TRINITY_DN85481_c8_g2_i2	PREDICTED: galactose-3-O-sulfotransferase 3-like [Hyalella azteca]	NA	2.59e-06	0.0011054
TRINITY_DN81834_c1_g1_i3	PREDICTED: inositol monophosphatase 2-like isoform X1 [Hyalella azteca]	2 S 0.555; 6 I 0.968*; 8 K 0.932; 10 F 0.784; 11 D 0.958*; 12 S 0.819; 18 K 0.792; 22 K 0.614; 25 K 0.871; 26 E 0.577; 29 S 0.692; 33 L 0.645; 34 V 0.846; 35 E 0.993**; 38 S 0.989*; 39 S 0.999**; 49 K 0.884; 50 A 0.790; 56 I 0.704; 58 D 0.917; 60 K 0.990*; 63 Y 0.631	3.96e-06	0.00150462
TRINITY_DN84735_c5_g1_i4	NA	2 F 1.000**; 3 S 0.843; 5 I 0.998**	7.09e-06	0.00242231
TRINITY_DN82771_c3_g2_i4	PREDICTED: multiple coagulation factor deficiency protein 2 homolog isoform X1 [Hyalella azteca]	NA	5.53e-05	0.0171869
TRINITY_DN48324_c0_g1_i2	40S ribosomal protein S4, X isoform [Homo sapiens] &gt;NP_033120.1 40S ribosomal protein S4, X isoform [Mus musculus] &gt;NP_001007601.1 40S ribosomal protein S4, X isoform [Rattus norvegicus] &gt;NP_001030522.1 40S ribosomal protein S4 [Bos taurus] &gt;NP_001157422.1 40S ribosomal protein S4 [Equus caballus] &gt;NP_001191212.1 40S ribosomal protein S4, X isoform [Sus scrofa] &gt;NP_001238971.1 4…	NA	6.41e-05	0.0178112
TRINITY_DN84203_c4_g1_i7	PREDICTED: tRNA (guanine-N(7)-)-methyltransferase non-catalytic subunit trm82-like, partial [Hyalella azteca]	196 D 0.999**	6.78e-05	0.0178112
TRINITY_DN86034_c6_g3_i7	PREDICTED: speckle targeted PIP5K1A-regulated poly(A) polymerase-like isoform X2	1 L 0.503; 2 Q 0.506; 3 R 0.503; 4 G 0.506; 5 G 0.505; 6 G 0.503; 7 G 0.503; 8 D 0.501; 9 K 0.503; 10 R 0.503; 11 S 0.504; 12 N 0.505; 13 T 0.501; 14 L 0.503; 15 S 0.505; 16 L 0.505; 17 Q 0.503; 18 N 0.505; 19 I 0.505; 20 F 0.504; 21 N 0.502; 22 A 0.503; 23 A 0.503; 24 N 0.504; 25 S 0.505; 26 T 0.505; 27 A 0.504; 28 H 0.503; 29 A 0.504; 30 V 0.503; 31 I 0.503; 32 T 0.505; 33 N 0.502; 34 Q 0.504; …	0.000140024	0.0341759
TRINITY_DN85930_c2_g8_i1	monoglyceride lipase-like [Penaeus vannamei]	16 I 0.987*	0.000419398	0.0955389
TRINITY_DN43283_c0_g1_i1	Cuticle protein 6, partial [Orchesella cincta]	NA	0.000487739	0.104163
TRINITY_DN85812_c6_g2_i3	General transcription factor 3C polypeptide 5 [Penaeus vannamei]	264 K 1.000**	0.000771873	0.155146
TRINITY_DN83477_c2_g1_i2	PREDICTED: uncharacterized protein LOC108672501 [Hyalella azteca] &gt;XP_018015667.1 PREDICTED: uncharacterized protein LOC108672501 [Hyalella azteca]	NA	0.000845015	0.160412
TRINITY_DN86299_c6_g1_i3	F-actin-capping protein subunit beta	NA	0.00120427	0.216578
TRINITY_DN87770_c0_g1_i1	contactin-associated protein	157 V 0.599; 285 R 0.731; 435 N 0.717; 765 S 0.511; 1093 V 0.595; 1269 Q 0.771; 1483 T 0.732	0.00143625	0.245384
TRINITY_DN46702_c0_g1_i1	PREDICTED: solute carrier family 2, facilitated glucose transporter member 1-like isoform X1 [Hyalella azteca]	10 S 0.998**; 19 R 0.762; 26 E 0.988*; 27 A 0.783; 35 D 0.526; 47 R 0.716; 57 I 0.603	0.00190511	0.309989
TRINITY_DN67954_c0_g1_i1	NA	187 E 0.683; 194 S 0.512	0.00209301	0.325083
TRINITY_DN86699_c0_g1_i2	IL-16-like protein [Penaeus vannamei]	NA	0.00265637	0.394644
TRINITY_DN85808_c3_g1_i6	PREDICTED: glycogenin-1-like isoform X1 [Hyalella azteca]	152 D 0.947; 248 Q 0.972*; 250 E 0.978*; 251 S 0.794	0.00334749	0.4766
TRINITY_DN87951_c4_g1_i4	PREDICTED: kielin/chordin-like protein isoform X1 [Hyalella azteca]	28 Q 0.530; 32 L 0.540; 38 D 0.853; 75 P 0.975*; 78 D 0.670; 80 S 0.867; 84 W 0.967*; 106 Q 0.719; 134 R 0.943; 160 S 0.616; 163 N 0.899; 164 R 0.782; 167 A 0.813; 169 L 0.960*; 192 G 0.961*; 199 S 0.957*; 212 N 0.935; 245 P 0.990**; 253 V 0.837; 256 S 0.936; 257 L 0.814; 310 E 0.592; 313 T 0.714; 329 L 0.917; 335 F 0.881; 396 S 0.815; 400 E 0.546; 424 I 0.786; 436 T 0.728	0.00374188	0.49586
TRINITY_DN81044_c2_g2_i2	PREDICTED: protein phosphatase 1 regulatory subunit 3B-like isoform X2 [Hyalella azteca]	148 S 0.998**	0.003773	0.49586
TRINITY_DN79211_c1_g1_i1	PREDICTED: putative lipoyltransferase 2, mitochondrial [Hyalella azteca]	NA	0.00423948	0.529842
TRINITY_DN80602_c2_g1_i4	PREDICTED: putative methyltransferase DDB_G0268948 [Hyalella azteca]	NA	0.00445405	0.529842
TRINITY_DN68634_c0_g1_i2	NA	11 C 0.980*	0.00449676	0.529842
TRINITY_DN82902_c1_g1_i3	PREDICTED: probable trans-2-enoyl-CoA reductase, mitochondrial [Hyalella azteca]	6 C 0.688; 114 A 0.990*; 125 N 0.905; 127 D 0.932; 294 L 0.982*; 303 Q 0.969*; 318 V 0.568; 352 I 0.873	0.00525719	0.584706
TRINITY_DN82409_c1_g1_i3	2-oxoglutarate dehydrogenase complex component E2 [Penaeus vannamei]	NA	0.00530462	0.584706
TRINITY_DN36971_c0_g2_i1	rhoGEF domain-containing protein gxcI-like isoform X2	NA	0.00562933	0.601107
TRINITY_DN88609_c1_g1_i1	PREDICTED: nucleolar protein 6-like [Hyalella azteca]	403 V 0.841; 520 G 0.865	0.00612876	0.634605
TRINITY_DN82740_c4_g2_i1	PREDICTED: serine-rich adhesin for platelets-like [Hyalella azteca]	NA	0.00837439	0.841626
TRINITY_DN83835_c4_g1_i1	PREDICTED: protein flightless-1-like [Hyalella azteca]	NA	0.00863925	0.843438
TRINITY_DN88252_c0_g1_i1	PREDICTED: puromycin-sensitive aminopeptidase-like [Hyalella azteca]	512 V 0.689; 778 C 0.640; 797 L 0.678; 805 T 0.955*; 813 E 0.709	0.0105747	1
TRINITY_DN82612_c1_g1_i1	PREDICTED: carbohydrate sulfotransferase 11-like [Hyalella azteca]	58 D 0.870; 212 S 0.692	0.0109433	1
TRINITY_DN83622_c0_g3_i2	tubulin-specific chaperone cofactor E-like protein [Penaeus vannamei] &gt;XP_027213663.1 tubulin-specific chaperone cofactor E-like protein [Penaeus vannamei] &gt;XP_027213664.1 tubulin-specific chaperone cofactor E-like protein [Penaeus vannamei] &gt;XP_027213665.1 tubulin-specific chaperone cofactor E-like protein [Penaeus vannamei] &gt;XP_027213666.1 tubulin-specific chaperone cofactor E-like …	329 A 0.754; 372 V 0.707	0.0119311	1
TRINITY_DN83152_c8_g1_i2	PREDICTED: uncharacterized protein LOC108670902 isoform X1 [Hyalella azteca]	NA	0.0147046	1
TRINITY_DN87761_c7_g1_i2	PREDICTED: cystinosin homolog isoform X1 [Hyalella azteca]	216 S 0.753	0.0157067	1
TRINITY_DN78242_c0_g1_i1	PREDICTED: uncharacterized protein LOC108667761 [Hyalella azteca]	NA	0.016872	1
TRINITY_DN71876_c0_g1_i1	PREDICTED: organic solute transporter subunit alpha-like [Hyalella azteca]	NA	0.0176653	1
TRINITY_DN74890_c0_g1_i2	PREDICTED: uncharacterized protein LOC108677380 isoform X1 [Hyalella azteca]	90 A 0.782	0.0178703	1
TRINITY_DN81395_c5_g1_i2	NA	117 K 0.725	0.02033	1
TRINITY_DN80671_c2_g2_i6	NA	24 R 0.921; 28 S 0.773; 108 K 0.620; 161 E 0.563	0.021154	1
TRINITY_DN86338_c1_g2_i1	armadillo repeat-containing protein 8-like isoform X2 [Penaeus vannamei]	NA	0.0269111	1
TRINITY_DN78876_c0_g1_i1	PREDICTED: cytochrome c oxidase subunit 5B, mitochondrial-like [Hyalella azteca]	NA	0.0287638	1
TRINITY_DN86353_c4_g1_i6	integrin alpha-PS2-like [Penaeus vannamei]	315 K 0.846	0.0290234	1
TRINITY_DN77593_c0_g1_i1	PREDICTED: solute carrier family 22 member 5-like [Hyalella azteca]	205 V 0.929	0.0313282	1
TRINITY_DN85591_c3_g1_i3	hypothetical protein C7M84_016453 [Penaeus vannamei]	197 R 0.906; 198 N 0.930; 217 A 0.693; 246 Q 0.978*	0.0324616	1
TRINITY_DN67359_c1_g1_i1	NA	NA	0.0354375	1
TRINITY_DN84261_c8_g3_i2	nuclease EXOG, mitochondrial-like [Penaeus vannamei] &gt;ROT76692.1 hypothetical protein C7M84_004726 [Penaeus vannamei]	132 E 0.897	0.0407083	1
TRINITY_DN83613_c0_g1_i2	PREDICTED: actin-related protein 2/3 complex subunit 2-like [Hyalella azteca]	13 G 0.978*; 50 P 0.956*	0.0416308	1
TRINITY_DN87321_c7_g1_i2	CBP80/20-dependent translation initiation factor isoform X1, partial [Procambarus clarkii]	NA	0.0420824	1
TRINITY_DN80482_c0_g1_i2	PREDICTED: uncharacterized protein LOC108670352 [Hyalella azteca]	NA	0.0424231	1
TRINITY_DN86068_c4_g1_i3	PREDICTED: protein cordon-bleu-like [Hyalella azteca]	37 N 0.962*; 167 D 0.584	0.047559	1
TRINITY_DN80174_c12_g4_i1	cyclase	NA	0.0476122	1
TRINITY_DN79337_c0_g1_i1	LOW QUALITY PROTEIN: hemocytin-like [Penaeus vannamei]	37 G 0.994**; 143 I 0.719	0.0495429	1
